# Supplementary material
Source: PubMed Central journal article supplement (PMC3625973)
Supplement: NIHMS444012-supplement-2_si_002.pdf [file NIHMS444012-supplement-2_si_002.pdf]

## **A Catalytic Enantioselective Tandem Allylation Strategy for Rapid Terpene Construction: Application to the Synthesis of Pumilaside Aglycon**

Grace E. Ferris, Kai Hong, Ian A. Roundtree, and James P. Morken\*

*Department of Chemistry, Merkert Chemistry Center, Boston College, Chestnut Hill, MA 02467*

### **Supporting Information - X-ray Crystallographic Data**

#### **Table of Contents**

|                                                                                                                                                                          |                    |
|--------------------------------------------------------------------------------------------------------------------------------------------------------------------------|--------------------|
| <b>(1<i>R</i>,2<i>S</i>,3<i>S</i>,4<i>S</i>)-2-methyl-2-(4-methylpent-3-en-1-yl)-3-vinylcyclohexane-1,4-diol. (6)</b>                                                    | <b>..... S-2a</b>  |
| <b>(1<i>S</i>,2<i>S</i>,3<i>S</i>,4<i>R</i>)-2-methyl-2-(4-methylpent-3-en-1-yl)-3-vinyl-1,2,3,4-tetrahydronaphthalen<br/>e-1,4-diol (4b)</b>                            | <b>..... S-13a</b> |
| <b>(1<i>S</i>,2<i>R</i>,3<i>S</i>,4<i>R</i>)-2-methyl-2-(4-methylpent-3-en-1-yl)-3-vinyl-1,2,3,4-tetrahydronaphthalen<br/>e-1,4-diol (<i>syn</i> diastereomer of 4c)</b> | <b>..... S-25a</b> |
| <b>(1<i>R</i>,4<i>S</i>,5<i>S</i>)-5-vinylspiro[5.5]undecane-1,4-diol (4f)</b>                                                                                           | <b>..... S-45a</b> |

**(1*R*,2*S*,3*S*,4*S*)-2-methyl-2-(4-methylpent-3-en-1-yl)-3-vinylcyclohexane-1,4-diol. (6)**

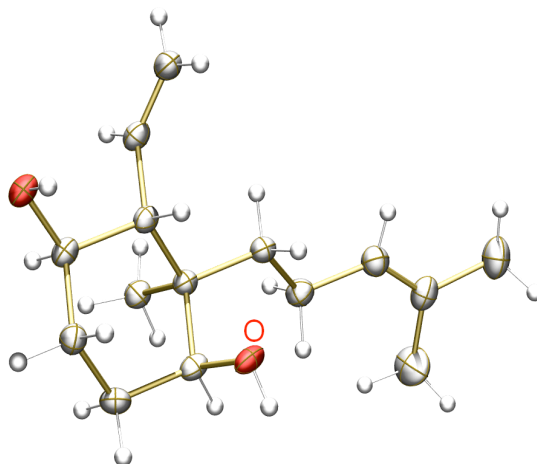

(*S,S*)-di-*iso*-propylTADDOL-PPh used when this crystal was obtained

Table 1. Crystal data and structure refinement for C<sub>15</sub>H<sub>26</sub>O<sub>2</sub>.

|                                 |                                                |                 |
|---------------------------------|------------------------------------------------|-----------------|
| Identification code             | C <sub>15</sub> H <sub>26</sub> O <sub>2</sub> |                 |
| Empirical formula               | C <sub>15</sub> H <sub>26</sub> O <sub>2</sub> |                 |
| Formula weight                  | 238.36                                         |                 |
| Temperature                     | 100(2) K                                       |                 |
| Wavelength                      | 1.54178 Å                                      |                 |
| Crystal system                  | Monoclinic                                     |                 |
| Space group                     | P 21                                           |                 |
| Unit cell dimensions            | a = 6.7212(6) Å                                | α = 90°.        |
|                                 | b = 7.0056(7) Å                                | β = 93.239(4)°. |
|                                 | c = 15.1193(14) Å                              | γ = 90°.        |
| Volume                          | 710.77(12) Å <sup>3</sup>                      |                 |
| Z                               | 2                                              |                 |
| Density (calculated)            | 1.114 Mg/m <sup>3</sup>                        |                 |
| Absorption coefficient          | 0.555 mm <sup>-1</sup>                         |                 |
| F(000)                          | 264                                            |                 |
| Crystal size                    | 0.40 x 0.10 x 0.08 mm <sup>3</sup>             |                 |
| Theta range for data collection | 2.93 to 66.49°.                                |                 |
| Index ranges                    | -7 ≤ h ≤ 7, -7 ≤ k ≤ 8, -17 ≤ l ≤ 17           |                 |
| Reflections collected           | 8331                                           |                 |
| Independent reflections         | 2356 [R(int) = 0.0250]                         |                 |
| Completeness to theta = 66.49°  | 97.9 %                                         |                 |
| Absorption correction           | Semi-empirical from equivalents                |                 |
| Max. and min. transmission      | 0.9569 and 0.8084                              |                 |

*Ferris, Hong, Roundtree & Morken, Supporting Information*

|                                   |                                             |
|-----------------------------------|---------------------------------------------|
| Refinement method                 | Full-matrix least-squares on F <sup>2</sup> |
| Data / restraints / parameters    | 2356 / 3 / 161                              |
| Goodness-of-fit on F <sup>2</sup> | 1.085                                       |
| Final R indices [I>2sigma(I)]     | R1 = 0.0312, wR2 = 0.0827                   |
| R indices (all data)              | R1 = 0.0314, wR2 = 0.0829                   |
| Absolute structure parameter      | 0.03(17)                                    |
| Extinction coefficient            | na                                          |
| Largest diff. peak and hole       | 0.183 and -0.158 e.Å <sup>-3</sup>          |

Table 2. Atomic coordinates ( $\times 10^4$ ) and equivalent isotropic displacement parameters ( $\text{\AA}^2 \times 10^3$ )

for C<sub>15</sub>H<sub>26</sub>O<sub>2</sub>. U(eq) is defined as one third of the trace of the orthogonalized U<sup>ij</sup> tensor.

|       | x        | y        | z       | U(eq) |
|-------|----------|----------|---------|-------|
| O(1)  | 4634(1)  | 10492(1) | 5998(1) | 25(1) |
| O(2)  | 3420(1)  | 4128(1)  | 5450(1) | 25(1) |
| C(1)  | 3401(2)  | 9678(2)  | 6646(1) | 22(1) |
| C(2)  | 1480(2)  | 8911(2)  | 6194(1) | 25(1) |
| C(3)  | 1889(2)  | 7263(2)  | 5565(1) | 24(1) |
| C(4)  | 3057(2)  | 5676(2)  | 6042(1) | 23(1) |
| C(5)  | 5010(2)  | 6447(2)  | 6496(1) | 21(1) |
| C(6)  | 4599(2)  | 8098(2)  | 7155(1) | 21(1) |
| C(7)  | 6202(2)  | 4839(2)  | 6919(1) | 24(1) |
| C(8)  | 7966(2)  | 4278(2)  | 6681(1) | 28(1) |
| C(9)  | 6606(2)  | 8893(2)  | 7536(1) | 23(1) |
| C(10) | 6528(2)  | 10279(2) | 8311(1) | 27(1) |
| C(11) | 8563(2)  | 11104(2) | 8558(1) | 30(1) |
| C(12) | 8979(2)  | 12613(2) | 9063(1) | 30(1) |
| C(13) | 11069(3) | 13319(3) | 9240(1) | 42(1) |
| C(14) | 7410(3)  | 13756(3) | 9492(1) | 48(1) |
| C(15) | 3374(2)  | 7387(2)  | 7921(1) | 25(1) |

Table 3. Bond lengths [Å] and angles [°] for C<sub>15</sub>H<sub>26</sub>O<sub>2</sub>.

---

|              |            |
|--------------|------------|
| O(1)-C(1)    | 1.4368(16) |
| O(1)-H(10)   | 0.815(16)  |
| O(2)-C(4)    | 1.4358(16) |
| O(2)-H(20)   | 0.830(15)  |
| C(1)-C(2)    | 1.5237(18) |
| C(1)-C(6)    | 1.5475(17) |
| C(1)-H(1)    | 1.0000     |
| C(2)-C(3)    | 1.5298(19) |
| C(2)-H(2A)   | 0.9900     |
| C(2)-H(2B)   | 0.9900     |
| C(3)-C(4)    | 1.5193(18) |
| C(3)-H(3A)   | 0.9900     |
| C(3)-H(3B)   | 0.9900     |
| C(4)-C(5)    | 1.5448(17) |
| C(4)-H(4)    | 1.0000     |
| C(5)-C(7)    | 1.5038(18) |
| C(5)-C(6)    | 1.5611(17) |
| C(5)-H(5)    | 1.0000     |
| C(6)-C(9)    | 1.5401(17) |
| C(6)-C(15)   | 1.5412(17) |
| C(7)-C(8)    | 1.318(2)   |
| C(7)-H(7)    | 0.9500     |
| C(8)-H(8A)   | 0.9500     |
| C(8)-H(8B)   | 0.9500     |
| C(9)-C(10)   | 1.5256(19) |
| C(9)-H(9A)   | 0.9900     |
| C(9)-H(9B)   | 0.9900     |
| C(10)-C(11)  | 1.5119(19) |
| C(10)-H(10A) | 0.9900     |
| C(10)-H(10B) | 0.9900     |
| C(11)-C(12)  | 1.325(2)   |
| C(11)-H(11)  | 0.9500     |
| C(12)-C(13)  | 1.499(2)   |
| C(12)-C(14)  | 1.500(2)   |
| C(13)-H(13A) | 0.9800     |
| C(13)-H(13B) | 0.9800     |

*Ferris, Hong, Roundtree & Morken, Supporting Information*

|                  |            |
|------------------|------------|
| C(13)-H(13C)     | 0.9800     |
| C(14)-H(14A)     | 0.9800     |
| C(14)-H(14B)     | 0.9800     |
| C(14)-H(14C)     | 0.9800     |
| C(15)-H(15A)     | 0.9800     |
| C(15)-H(15B)     | 0.9800     |
| C(15)-H(15C)     | 0.9800     |
|                  |            |
| C(1)-O(1)-H(1O)  | 109.1(14)  |
| C(4)-O(2)-H(2O)  | 108.0(14)  |
| O(1)-C(1)-C(2)   | 109.93(10) |
| O(1)-C(1)-C(6)   | 108.61(10) |
| C(2)-C(1)-C(6)   | 112.01(11) |
| O(1)-C(1)-H(1)   | 108.7      |
| C(2)-C(1)-H(1)   | 108.7      |
| C(6)-C(1)-H(1)   | 108.7      |
| C(1)-C(2)-C(3)   | 111.54(10) |
| C(1)-C(2)-H(2A)  | 109.3      |
| C(3)-C(2)-H(2A)  | 109.3      |
| C(1)-C(2)-H(2B)  | 109.3      |
| C(3)-C(2)-H(2B)  | 109.3      |
| H(2A)-C(2)-H(2B) | 108.0      |
| C(4)-C(3)-C(2)   | 111.32(10) |
| C(4)-C(3)-H(3A)  | 109.4      |
| C(2)-C(3)-H(3A)  | 109.4      |
| C(4)-C(3)-H(3B)  | 109.4      |
| C(2)-C(3)-H(3B)  | 109.4      |
| H(3A)-C(3)-H(3B) | 108.0      |
| O(2)-C(4)-C(3)   | 110.99(10) |
| O(2)-C(4)-C(5)   | 111.80(10) |
| C(3)-C(4)-C(5)   | 110.97(10) |
| O(2)-C(4)-H(4)   | 107.6      |
| C(3)-C(4)-H(4)   | 107.6      |
| C(5)-C(4)-H(4)   | 107.6      |
| C(7)-C(5)-C(4)   | 110.23(11) |
| C(7)-C(5)-C(6)   | 113.14(10) |
| C(4)-C(5)-C(6)   | 111.48(10) |
| C(7)-C(5)-H(5)   | 107.2      |

*Ferris, Hong, Roundtree & Morken, Supporting Information*

|                     |            |
|---------------------|------------|
| C(4)-C(5)-H(5)      | 107.2      |
| C(6)-C(5)-H(5)      | 107.2      |
| C(9)-C(6)-C(15)     | 109.22(10) |
| C(9)-C(6)-C(1)      | 110.36(10) |
| C(15)-C(6)-C(1)     | 108.64(10) |
| C(9)-C(6)-C(5)      | 108.87(10) |
| C(15)-C(6)-C(5)     | 111.18(11) |
| C(1)-C(6)-C(5)      | 108.57(10) |
| C(8)-C(7)-C(5)      | 124.97(13) |
| C(8)-C(7)-H(7)      | 117.5      |
| C(5)-C(7)-H(7)      | 117.5      |
| C(7)-C(8)-H(8A)     | 120.0      |
| C(7)-C(8)-H(8B)     | 120.0      |
| H(8A)-C(8)-H(8B)    | 120.0      |
| C(10)-C(9)-C(6)     | 116.76(11) |
| C(10)-C(9)-H(9A)    | 108.1      |
| C(6)-C(9)-H(9A)     | 108.1      |
| C(10)-C(9)-H(9B)    | 108.1      |
| C(6)-C(9)-H(9B)     | 108.1      |
| H(9A)-C(9)-H(9B)    | 107.3      |
| C(11)-C(10)-C(9)    | 111.32(11) |
| C(11)-C(10)-H(10A)  | 109.4      |
| C(9)-C(10)-H(10A)   | 109.4      |
| C(11)-C(10)-H(10B)  | 109.4      |
| C(9)-C(10)-H(10B)   | 109.4      |
| H(10A)-C(10)-H(10B) | 108.0      |
| C(12)-C(11)-C(10)   | 127.32(13) |
| C(12)-C(11)-H(11)   | 116.3      |
| C(10)-C(11)-H(11)   | 116.3      |
| C(11)-C(12)-C(13)   | 122.09(15) |
| C(11)-C(12)-C(14)   | 122.96(14) |
| C(13)-C(12)-C(14)   | 114.94(14) |
| C(12)-C(13)-H(13A)  | 109.5      |
| C(12)-C(13)-H(13B)  | 109.5      |
| H(13A)-C(13)-H(13B) | 109.5      |
| C(12)-C(13)-H(13C)  | 109.5      |
| H(13A)-C(13)-H(13C) | 109.5      |
| H(13B)-C(13)-H(13C) | 109.5      |

|                     |       |
|---------------------|-------|
| C(12)-C(14)-H(14A)  | 109.5 |
| C(12)-C(14)-H(14B)  | 109.5 |
| H(14A)-C(14)-H(14B) | 109.5 |
| C(12)-C(14)-H(14C)  | 109.5 |
| H(14A)-C(14)-H(14C) | 109.5 |
| H(14B)-C(14)-H(14C) | 109.5 |
| C(6)-C(15)-H(15A)   | 109.5 |
| C(6)-C(15)-H(15B)   | 109.5 |
| H(15A)-C(15)-H(15B) | 109.5 |
| C(6)-C(15)-H(15C)   | 109.5 |
| H(15A)-C(15)-H(15C) | 109.5 |
| H(15B)-C(15)-H(15C) | 109.5 |

---

Symmetry transformations used to generate equivalent atoms:



Table 4. Anisotropic displacement parameters ( $\text{\AA}^2 \times 10^3$ ) for C15H26O2. The anisotropic displacement factor exponent takes the form:  $-2\pi^2 [ h^2 a^{*2} U^{11} + \dots + 2 h k a^* b^* U^{12} ]$

|       | U <sup>11</sup> | U <sup>22</sup> | U <sup>33</sup> | U <sup>23</sup> | U <sup>13</sup> | U <sup>12</sup> |
|-------|-----------------|-----------------|-----------------|-----------------|-----------------|-----------------|
| O(1)  | 34(1)           | 15(1)           | 27(1)           | 3(1)            | 7(1)            | 2(1)            |
| O(2)  | 32(1)           | 18(1)           | 24(1)           | -1(1)           | 3(1)            | -2(1)           |
| C(1)  | 28(1)           | 18(1)           | 22(1)           | -1(1)           | 5(1)            | 2(1)            |
| C(2)  | 25(1)           | 24(1)           | 26(1)           | 2(1)            | 0(1)            | 5(1)            |
| C(3)  | 25(1)           | 22(1)           | 24(1)           | 0(1)            | 0(1)            | -2(1)           |
| C(4)  | 27(1)           | 18(1)           | 23(1)           | 0(1)            | 2(1)            | -1(1)           |
| C(5)  | 23(1)           | 18(1)           | 22(1)           | 2(1)            | 4(1)            | -1(1)           |
| C(6)  | 22(1)           | 18(1)           | 22(1)           | 0(1)            | 1(1)            | 1(1)            |
| C(7)  | 30(1)           | 18(1)           | 24(1)           | 3(1)            | 1(1)            | 0(1)            |
| C(8)  | 27(1)           | 22(1)           | 34(1)           | -1(1)           | -3(1)           | 1(1)            |
| C(9)  | 24(1)           | 20(1)           | 26(1)           | 0(1)            | 0(1)            | 1(1)            |
| C(10) | 29(1)           | 25(1)           | 26(1)           | -1(1)           | 0(1)            | 1(1)            |
| C(11) | 30(1)           | 29(1)           | 30(1)           | -1(1)           | 0(1)            | 0(1)            |
| C(12) | 39(1)           | 28(1)           | 22(1)           | 3(1)            | -3(1)           | -6(1)           |
| C(13) | 47(1)           | 41(1)           | 37(1)           | -3(1)           | -2(1)           | -15(1)          |
| C(14) | 52(1)           | 48(1)           | 45(1)           | -22(1)          | -4(1)           | -2(1)           |
| C(15) | 28(1)           | 23(1)           | 23(1)           | 1(1)            | 2(1)            | 0(1)            |

Table 5. Hydrogen coordinates ( $\times 10^4$ ) and isotropic displacement parameters ( $\text{\AA}^2 \times 10^{-3}$ ) for C15H26O2.

|        | x        | y         | z        | U(eq) |
|--------|----------|-----------|----------|-------|
| H(1O)  | 4240(30) | 11570(20) | 5877(12) | 38    |
| H(2O)  | 3990(20) | 4570(30)  | 5021(10) | 37    |
| H(1)   | 3057     | 10697     | 7074     | 27    |
| H(2A)  | 792      | 9952      | 5856     | 30    |
| H(2B)  | 588      | 8463      | 6650     | 30    |
| H(3A)  | 608      | 6749      | 5312     | 29    |
| H(3B)  | 2654     | 7744      | 5071     | 29    |
| H(4)   | 2221     | 5172      | 6516     | 27    |
| H(5)   | 5816     | 6995      | 6021     | 25    |
| H(7)   | 5641     | 4178      | 7394     | 29    |
| H(8A)  | 8576     | 4905      | 6210     | 33    |
| H(8B)  | 8627     | 3247      | 6982     | 33    |
| H(9A)  | 7458     | 7800      | 7728     | 28    |
| H(9B)  | 7268     | 9545      | 7051     | 28    |
| H(10A) | 5590     | 11329     | 8149     | 32    |
| H(10B) | 6025     | 9605      | 8829     | 32    |
| H(11)  | 9667     | 10469     | 8325     | 36    |
| H(13A) | 11992    | 12489     | 8939     | 63    |
| H(13B) | 11406    | 13303     | 9879     | 63    |
| H(13C) | 11177    | 14626     | 9016     | 63    |
| H(14A) | 6098     | 13194     | 9345     | 73    |
| H(14B) | 7433     | 15074     | 9275     | 73    |
| H(14C) | 7675     | 13748     | 10136    | 73    |
| H(15A) | 4208     | 6563      | 8312     | 37    |
| H(15B) | 2219     | 6664      | 7680     | 37    |
| H(15C) | 2918     | 8483      | 8257     | 37    |

Table 6. Torsion angles [°] for C15H26O2.

---

|                         |             |
|-------------------------|-------------|
| O(1)-C(1)-C(2)-C(3)     | 64.25(14)   |
| C(6)-C(1)-C(2)-C(3)     | -56.60(14)  |
| C(1)-C(2)-C(3)-C(4)     | 55.59(14)   |
| C(2)-C(3)-C(4)-O(2)     | 179.50(10)  |
| C(2)-C(3)-C(4)-C(5)     | -55.54(14)  |
| O(2)-C(4)-C(5)-C(7)     | -52.21(13)  |
| C(3)-C(4)-C(5)-C(7)     | -176.71(10) |
| O(2)-C(4)-C(5)-C(6)     | -178.72(10) |
| C(3)-C(4)-C(5)-C(6)     | 56.78(13)   |
| O(1)-C(1)-C(6)-C(9)     | 53.70(13)   |
| C(2)-C(1)-C(6)-C(9)     | 175.31(10)  |
| O(1)-C(1)-C(6)-C(15)    | 173.42(10)  |
| C(2)-C(1)-C(6)-C(15)    | -64.97(13)  |
| O(1)-C(1)-C(6)-C(5)     | -65.54(12)  |
| C(2)-C(1)-C(6)-C(5)     | 56.06(13)   |
| C(7)-C(5)-C(6)-C(9)     | 58.89(14)   |
| C(4)-C(5)-C(6)-C(9)     | -176.21(10) |
| C(7)-C(5)-C(6)-C(15)    | -61.47(14)  |
| C(4)-C(5)-C(6)-C(15)    | 63.43(13)   |
| C(7)-C(5)-C(6)-C(1)     | 179.07(11)  |
| C(4)-C(5)-C(6)-C(1)     | -56.03(13)  |
| C(4)-C(5)-C(7)-C(8)     | 115.54(14)  |
| C(6)-C(5)-C(7)-C(8)     | -118.89(14) |
| C(15)-C(6)-C(9)-C(10)   | -48.13(15)  |
| C(1)-C(6)-C(9)-C(10)    | 71.25(14)   |
| C(5)-C(6)-C(9)-C(10)    | -169.69(11) |
| C(6)-C(9)-C(10)-C(11)   | -174.11(12) |
| C(9)-C(10)-C(11)-C(12)  | 164.92(14)  |
| C(10)-C(11)-C(12)-C(13) | -178.37(14) |
| C(10)-C(11)-C(12)-C(14) | 0.9(2)      |

---

Symmetry transformations used to generate equivalent atoms:

Table 7. Hydrogen bonds for C<sub>15</sub>H<sub>26</sub>O<sub>2</sub> [Å and °].

| D-H...A             | d(D-H)    | d(H...A)  | d(D...A)   | <(DHA)    |
|---------------------|-----------|-----------|------------|-----------|
| O(1)-H(1O)...O(2)#1 | 0.815(16) | 1.976(16) | 2.7863(13) | 173.3(19) |
| O(2)-H(2O)...O(1)#2 | 0.830(15) | 1.952(15) | 2.7817(13) | 177.5(19) |

Symmetry transformations used to generate equivalent atoms:

#1  $x, y+1, z$     #2  $-x+1, y-1/2, -z+1$

**(1*S*,2*S*,3*S*,4*R*)-2-methyl-2-(4-methylpent-3-en-1-yl)-3-vinyl-1,2,3,4-tetrahydronaphthalene-1,4-diol (4b)**

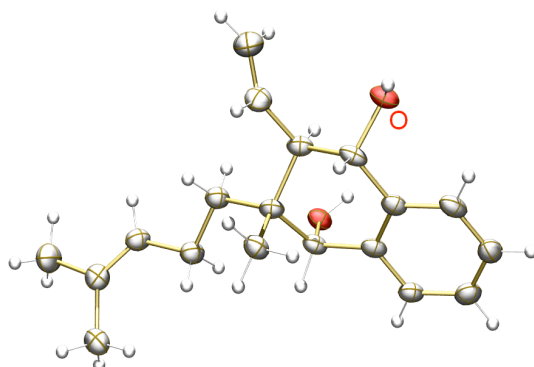

(*S,S*)-di-*iso*-propylTADDOL-PPh used when this crystal was obtained

Table 1. Crystal data and structure refinement for sad.

|                                 |                                             |                             |
|---------------------------------|---------------------------------------------|-----------------------------|
| Identification code             | C19H26O2                                    |                             |
| Empirical formula               | C19 H26 O2                                  |                             |
| Formula weight                  | 286.40                                      |                             |
| Temperature                     | 100(2) K                                    |                             |
| Wavelength                      | 1.54178 Å                                   |                             |
| Crystal system                  | Monoclinic                                  |                             |
| Space group                     | P 21                                        |                             |
| Unit cell dimensions            | a = 8.5973(10) Å                            | $\alpha = 90^\circ$ .       |
|                                 | b = 7.2630(10) Å                            | $\beta = 91.863(9)^\circ$ . |
|                                 | c = 13.3032(16) Å                           | $\gamma = 90^\circ$ .       |
| Volume                          | 830.24(18) Å <sup>3</sup>                   |                             |
| Z                               | 2                                           |                             |
| Density (calculated)            | 1.146 Mg/m <sup>3</sup>                     |                             |
| Absorption coefficient          | 0.562 mm <sup>-1</sup>                      |                             |
| F(000)                          | 312                                         |                             |
| Crystal size                    | 0.15 x 0.05 x 0.04 mm <sup>3</sup>          |                             |
| Theta range for data collection | 3.32 to 65.43°.                             |                             |
| Index ranges                    | -10 ≤ h ≤ 10, -7 ≤ k ≤ 8, -15 ≤ l ≤ 15      |                             |
| Reflections collected           | 9045                                        |                             |
| Independent reflections         | 2711 [R(int) = 0.0593]                      |                             |
| Completeness to theta = 65.43°  | 98.8 %                                      |                             |
| Absorption correction           | Semi-empirical from equivalents             |                             |
| Max. and min. transmission      | 0.9779 and 0.9204                           |                             |
| Refinement method               | Full-matrix least-squares on F <sup>2</sup> |                             |
| Data / restraints / parameters  | 2711 / 6 / 208                              |                             |

*Ferris, Hong, Roundtree & Morken, Supporting Information*

|                                      |                                       |
|--------------------------------------|---------------------------------------|
| Goodness-of-fit on $F^2$             | 1.080                                 |
| Final R indices [ $I > 2\sigma(I)$ ] | R1 = 0.0473, wR2 = 0.1116             |
| R indices (all data)                 | R1 = 0.0561, wR2 = 0.1159             |
| Extinction coefficient               | 0.0102(17)                            |
| Largest diff. peak and hole          | 0.199 and -0.163 e. $\text{\AA}^{-3}$ |
| Absolute structure parameter         | -0.2(3)                               |

Table 2. Atomic coordinates ( $\times 10^4$ ) and equivalent isotropic displacement parameters ( $\text{\AA}^2 \times 10^3$ )

for sad.  $U(\text{eq})$  is defined as one third of the trace of the orthogonalized  $U^{ij}$  tensor.

|       | x        | y        | z        | U(eq) |
|-------|----------|----------|----------|-------|
| O(1)  | 8633(2)  | 2367(3)  | 9130(1)  | 29(1) |
| O(2)  | 9449(2)  | 8730(3)  | 9372(1)  | 32(1) |
| C(1)  | 7340(3)  | 3568(4)  | 8893(2)  | 27(1) |
| C(2)  | 7023(2)  | 4739(4)  | 9807(2)  | 27(1) |
| C(3)  | 6308(3)  | 3892(4)  | 10625(2) | 30(1) |
| C(4)  | 6139(3)  | 4853(4)  | 11512(2) | 35(1) |
| C(5)  | 6666(3)  | 6629(4)  | 11603(2) | 33(1) |
| C(6)  | 7331(3)  | 7492(4)  | 10793(2) | 33(1) |
| C(7)  | 7515(2)  | 6546(4)  | 9890(2)  | 27(1) |
| C(8)  | 8234(3)  | 7521(4)  | 9011(2)  | 28(1) |
| C(9)  | 8879(3)  | 6189(4)  | 8242(2)  | 28(1) |
| C(10) | 7633(2)  | 4717(4)  | 7950(2)  | 27(1) |
| C(11) | 9494(3)  | 7204(4)  | 7356(2)  | 36(1) |
| C(12) | 10970(4) | 7305(6)  | 7135(2)  | 52(1) |
| C(13) | 8229(3)  | 3484(4)  | 7099(2)  | 30(1) |
| C(14) | 7261(3)  | 1776(4)  | 6860(2)  | 32(1) |
| C(15) | 7795(3)  | 781(4)   | 5938(2)  | 33(1) |
| C(16) | 6952(3)  | -297(4)  | 5321(2)  | 34(1) |
| C(17) | 5239(3)  | -664(5)  | 5420(2)  | 40(1) |
| C(18) | 7679(4)  | -1300(5) | 4464(2)  | 49(1) |
| C(19) | 6090(3)  | 5621(4)  | 7597(2)  | 32(1) |

Table 3. Bond lengths [Å] and angles [°] for *sad*.

---

|              |           |
|--------------|-----------|
| O(1)-C(1)    | 1.440(3)  |
| O(1)-H(10)   | 0.845(18) |
| O(2)-C(8)    | 1.435(3)  |
| O(2)-H(20)   | 0.897(18) |
| C(1)-C(2)    | 1.515(4)  |
| C(1)-C(10)   | 1.535(4)  |
| C(1)-H(1)    | 1.002(17) |
| C(2)-C(7)    | 1.382(4)  |
| C(2)-C(3)    | 1.409(4)  |
| C(3)-C(4)    | 1.383(4)  |
| C(3)-H(3)    | 0.9500    |
| C(4)-C(5)    | 1.371(4)  |
| C(4)-H(4)    | 0.9500    |
| C(5)-C(6)    | 1.386(4)  |
| C(5)-H(5)    | 0.9500    |
| C(6)-C(7)    | 1.398(4)  |
| C(6)-H(6)    | 0.9500    |
| C(7)-C(8)    | 1.516(4)  |
| C(8)-C(9)    | 1.526(4)  |
| C(8)-H(8)    | 1.028(17) |
| C(9)-C(11)   | 1.502(4)  |
| C(9)-C(10)   | 1.554(3)  |
| C(9)-H(9)    | 1.011(17) |
| C(10)-C(19)  | 1.539(3)  |
| C(10)-C(13)  | 1.544(4)  |
| C(11)-C(12)  | 1.313(4)  |
| C(11)-H(11)  | 0.9500    |
| C(12)-H(12A) | 0.9500    |
| C(12)-H(12B) | 0.9500    |
| C(13)-C(14)  | 1.522(4)  |
| C(13)-H(13A) | 0.9900    |
| C(13)-H(13B) | 0.9900    |
| C(14)-C(15)  | 1.508(4)  |
| C(14)-H(14A) | 0.9900    |
| C(14)-H(14B) | 0.9900    |
| C(15)-C(16)  | 1.332(4)  |



*Ferris, Hong, Roundtree & Morken, Supporting Information*

|                 |            |
|-----------------|------------|
| C(15)-H(15A)    | 0.9500     |
| C(16)-C(18)     | 1.506(4)   |
| C(16)-C(17)     | 1.506(4)   |
| C(17)-H(17A)    | 0.9800     |
| C(17)-H(17B)    | 0.9800     |
| C(17)-H(17C)    | 0.9800     |
| C(18)-H(18A)    | 0.9800     |
| C(18)-H(18B)    | 0.9800     |
| C(18)-H(18C)    | 0.9800     |
| C(19)-H(19A)    | 0.9800     |
| C(19)-H(19B)    | 0.9800     |
| C(19)-H(19C)    | 0.9800     |
|                 |            |
| C(1)-O(1)-H(10) | 107(2)     |
| C(8)-O(2)-H(20) | 111(2)     |
| O(1)-C(1)-C(2)  | 108.76(18) |
| O(1)-C(1)-C(10) | 111.26(19) |
| C(2)-C(1)-C(10) | 112.9(2)   |
| O(1)-C(1)-H(1)  | 103.0(16)  |
| C(2)-C(1)-H(1)  | 109.7(15)  |
| C(10)-C(1)-H(1) | 110.8(15)  |
| C(7)-C(2)-C(3)  | 119.5(2)   |
| C(7)-C(2)-C(1)  | 122.3(2)   |
| C(3)-C(2)-C(1)  | 118.0(2)   |
| C(4)-C(3)-C(2)  | 120.0(3)   |
| C(4)-C(3)-H(3)  | 120.0      |
| C(2)-C(3)-H(3)  | 120.0      |
| C(5)-C(4)-C(3)  | 120.4(3)   |
| C(5)-C(4)-H(4)  | 119.8      |
| C(3)-C(4)-H(4)  | 119.8      |
| C(4)-C(5)-C(6)  | 120.0(3)   |
| C(4)-C(5)-H(5)  | 120.0      |
| C(6)-C(5)-H(5)  | 120.0      |
| C(5)-C(6)-C(7)  | 120.5(3)   |
| C(5)-C(6)-H(6)  | 119.8      |
| C(7)-C(6)-H(6)  | 119.8      |
| C(2)-C(7)-C(6)  | 119.5(2)   |
| C(2)-C(7)-C(8)  | 120.9(2)   |

*Ferris, Hong, Roundtree & Morken, Supporting Information*

|                     |            |
|---------------------|------------|
| C(6)-C(7)-C(8)      | 119.6(2)   |
| O(2)-C(8)-C(7)      | 109.78(19) |
| O(2)-C(8)-C(9)      | 109.61(19) |
| C(7)-C(8)-C(9)      | 112.8(2)   |
| O(2)-C(8)-H(8)      | 104.6(17)  |
| C(7)-C(8)-H(8)      | 110.7(15)  |
| C(9)-C(8)-H(8)      | 109.0(15)  |
| C(11)-C(9)-C(8)     | 111.1(2)   |
| C(11)-C(9)-C(10)    | 113.5(2)   |
| C(8)-C(9)-C(10)     | 109.96(19) |
| C(11)-C(9)-H(9)     | 109.1(16)  |
| C(8)-C(9)-H(9)      | 107.7(16)  |
| C(10)-C(9)-H(9)     | 105.1(18)  |
| C(1)-C(10)-C(19)    | 108.59(19) |
| C(1)-C(10)-C(13)    | 110.6(2)   |
| C(19)-C(10)-C(13)   | 109.1(2)   |
| C(1)-C(10)-C(9)     | 107.4(2)   |
| C(19)-C(10)-C(9)    | 111.3(2)   |
| C(13)-C(10)-C(9)    | 109.85(19) |
| C(12)-C(11)-C(9)    | 124.8(3)   |
| C(12)-C(11)-H(11)   | 117.6      |
| C(9)-C(11)-H(11)    | 117.6      |
| C(11)-C(12)-H(12A)  | 120.0      |
| C(11)-C(12)-H(12B)  | 120.0      |
| H(12A)-C(12)-H(12B) | 120.0      |
| C(14)-C(13)-C(10)   | 115.69(19) |
| C(14)-C(13)-H(13A)  | 108.4      |
| C(10)-C(13)-H(13A)  | 108.4      |
| C(14)-C(13)-H(13B)  | 108.4      |
| C(10)-C(13)-H(13B)  | 108.4      |
| H(13A)-C(13)-H(13B) | 107.4      |
| C(15)-C(14)-C(13)   | 112.4(2)   |
| C(15)-C(14)-H(14A)  | 109.1      |
| C(13)-C(14)-H(14A)  | 109.1      |
| C(15)-C(14)-H(14B)  | 109.1      |
| C(13)-C(14)-H(14B)  | 109.1      |
| H(14A)-C(14)-H(14B) | 107.8      |
| C(16)-C(15)-C(14)   | 127.5(2)   |

|                     |          |
|---------------------|----------|
| C(16)-C(15)-H(15A)  | 116.2    |
| C(14)-C(15)-H(15A)  | 116.2    |
| C(15)-C(16)-C(18)   | 121.3(2) |
| C(15)-C(16)-C(17)   | 124.3(2) |
| C(18)-C(16)-C(17)   | 114.3(2) |
| C(16)-C(17)-H(17A)  | 109.5    |
| C(16)-C(17)-H(17B)  | 109.5    |
| H(17A)-C(17)-H(17B) | 109.5    |
| C(16)-C(17)-H(17C)  | 109.5    |
| H(17A)-C(17)-H(17C) | 109.5    |
| H(17B)-C(17)-H(17C) | 109.5    |
| C(16)-C(18)-H(18A)  | 109.5    |
| C(16)-C(18)-H(18B)  | 109.5    |
| H(18A)-C(18)-H(18B) | 109.5    |
| C(16)-C(18)-H(18C)  | 109.5    |
| H(18A)-C(18)-H(18C) | 109.5    |
| H(18B)-C(18)-H(18C) | 109.5    |
| C(10)-C(19)-H(19A)  | 109.5    |
| C(10)-C(19)-H(19B)  | 109.5    |
| H(19A)-C(19)-H(19B) | 109.5    |
| C(10)-C(19)-H(19C)  | 109.5    |
| H(19A)-C(19)-H(19C) | 109.5    |
| H(19B)-C(19)-H(19C) | 109.5    |

---

Symmetry transformations used to generate equivalent atoms:

Table 4. Anisotropic displacement parameters ( $\text{\AA}^2 \times 10^3$ ) for sad. The anisotropic displacement factor exponent takes the form:  $-2\pi^2 [ h^2 a^{*2} U^{11} + \dots + 2 h k a^* b^* U^{12} ]$

|       | U <sup>11</sup> | U <sup>22</sup> | U <sup>33</sup> | U <sup>23</sup> | U <sup>13</sup> | U <sup>12</sup> |
|-------|-----------------|-----------------|-----------------|-----------------|-----------------|-----------------|
| O(1)  | 22(1)           | 26(1)           | 39(1)           | -4(1)           | -3(1)           | 2(1)            |
| O(2)  | 27(1)           | 23(1)           | 47(1)           | 1(1)            | -6(1)           | -3(1)           |
| C(1)  | 19(1)           | 23(2)           | 38(1)           | -3(1)           | -1(1)           | 0(1)            |
| C(2)  | 14(1)           | 27(2)           | 39(1)           | 0(1)            | -2(1)           | 4(1)            |
| C(3)  | 20(1)           | 30(2)           | 40(2)           | -1(1)           | 2(1)            | -1(1)           |
| C(4)  | 21(1)           | 44(2)           | 40(2)           | 1(1)            | 5(1)            | 2(1)            |
| C(5)  | 22(1)           | 38(2)           | 39(2)           | -8(1)           | 2(1)            | 4(1)            |
| C(6)  | 19(1)           | 30(2)           | 48(2)           | -9(1)           | -3(1)           | 0(1)            |
| C(7)  | 15(1)           | 29(2)           | 37(1)           | -1(1)           | -3(1)           | 4(1)            |
| C(8)  | 19(1)           | 21(2)           | 44(2)           | -1(1)           | -6(1)           | -1(1)           |
| C(9)  | 20(1)           | 25(2)           | 39(1)           | 3(1)            | 1(1)            | 0(1)            |
| C(10) | 18(1)           | 28(2)           | 36(1)           | 2(1)            | 0(1)            | -1(1)           |
| C(11) | 40(2)           | 26(2)           | 42(2)           | 0(1)            | 3(1)            | -7(1)           |
| C(12) | 49(2)           | 57(2)           | 49(2)           | 1(2)            | 10(1)           | -20(2)          |
| C(13) | 24(1)           | 30(2)           | 36(1)           | -1(1)           | 2(1)            | -1(1)           |
| C(14) | 28(1)           | 31(2)           | 39(2)           | -5(1)           | 4(1)            | -2(1)           |
| C(15) | 28(1)           | 32(2)           | 39(1)           | -2(1)           | 6(1)            | 0(1)            |
| C(16) | 37(1)           | 28(2)           | 38(2)           | 0(1)            | 2(1)            | 3(1)            |
| C(17) | 39(1)           | 39(2)           | 41(2)           | 0(1)            | -5(1)           | -2(1)           |
| C(18) | 51(2)           | 51(2)           | 47(2)           | -18(2)          | 8(1)            | -5(2)           |
| C(19) | 26(1)           | 32(2)           | 37(1)           | -3(1)           | -3(1)           | 0(1)            |

Table 5. Hydrogen coordinates ( $\times 10^4$ ) and isotropic displacement parameters ( $\text{\AA}^2 \times 10^{-3}$ ) for sad.

|        | x        | y        | z        | U(eq) |
|--------|----------|----------|----------|-------|
| H(1O)  | 9200(30) | 2900(40) | 9573(19) | 44    |
| H(2O)  | 9200(40) | 9910(30) | 9250(20) | 48    |
| H(1)   | 6460(30) | 2690(30) | 8768(19) | 32    |
| H(3)   | 5941     | 2661     | 10567    | 36    |
| H(4)   | 5655     | 4279     | 12062    | 42    |
| H(5)   | 6576     | 7268     | 12222    | 40    |
| H(6)   | 7665     | 8736     | 10853    | 39    |
| H(8)   | 7440(30) | 8370(40) | 8656(18) | 34    |
| H(9)   | 9760(30) | 5480(40) | 8585(18) | 33    |
| H(11)  | 8763     | 7818     | 6923     | 43    |
| H(12A) | 11735    | 6708     | 7550     | 62    |
| H(12B) | 11272    | 7974     | 6559     | 62    |
| H(13A) | 8281     | 4236     | 6480     | 36    |
| H(13B) | 9303     | 3089     | 7284     | 36    |
| H(14A) | 7325     | 927      | 7442     | 39    |
| H(14B) | 6158     | 2139     | 6754     | 39    |
| H(15A) | 8855     | 942      | 5779     | 39    |
| H(17A) | 5080     | -1965    | 5583     | 59    |
| H(17B) | 4687     | -371     | 4784     | 59    |
| H(17C) | 4835     | 106      | 5958     | 59    |
| H(18A) | 8799     | -1042    | 4470     | 74    |
| H(18B) | 7200     | -884     | 3826     | 74    |
| H(18C) | 7514     | -2627    | 4539     | 74    |
| H(19A) | 5330     | 4662     | 7415     | 48    |
| H(19B) | 6269     | 6399     | 7010     | 48    |
| H(19C) | 5690     | 6377     | 8141     | 48    |

Table 6. Torsion angles [°] for sad.

---

|                        |            |
|------------------------|------------|
| O(1)-C(1)-C(2)-C(7)    | 101.1(3)   |
| C(10)-C(1)-C(2)-C(7)   | -22.9(3)   |
| O(1)-C(1)-C(2)-C(3)    | -74.0(3)   |
| C(10)-C(1)-C(2)-C(3)   | 162.04(19) |
| C(7)-C(2)-C(3)-C(4)    | -1.7(3)    |
| C(1)-C(2)-C(3)-C(4)    | 173.5(2)   |
| C(2)-C(3)-C(4)-C(5)    | -0.1(3)    |
| C(3)-C(4)-C(5)-C(6)    | 1.9(4)     |
| C(4)-C(5)-C(6)-C(7)    | -2.0(4)    |
| C(3)-C(2)-C(7)-C(6)    | 1.7(3)     |
| C(1)-C(2)-C(7)-C(6)    | -173.3(2)  |
| C(3)-C(2)-C(7)-C(8)    | -177.7(2)  |
| C(1)-C(2)-C(7)-C(8)    | 7.3(3)     |
| C(5)-C(6)-C(7)-C(2)    | 0.2(3)     |
| C(5)-C(6)-C(7)-C(8)    | 179.5(2)   |
| C(2)-C(7)-C(8)-O(2)    | -143.7(2)  |
| C(6)-C(7)-C(8)-O(2)    | 36.9(3)    |
| C(2)-C(7)-C(8)-C(9)    | -21.2(3)   |
| C(6)-C(7)-C(8)-C(9)    | 159.46(19) |
| O(2)-C(8)-C(9)-C(11)   | -60.7(3)   |
| C(7)-C(8)-C(9)-C(11)   | 176.65(19) |
| O(2)-C(8)-C(9)-C(10)   | 172.7(2)   |
| C(7)-C(8)-C(9)-C(10)   | 50.1(3)    |
| O(1)-C(1)-C(10)-C(19)  | 167.0(2)   |
| C(2)-C(1)-C(10)-C(19)  | -70.3(3)   |
| O(1)-C(1)-C(10)-C(13)  | 47.4(3)    |
| C(2)-C(1)-C(10)-C(13)  | 170.03(18) |
| O(1)-C(1)-C(10)-C(9)   | -72.5(2)   |
| C(2)-C(1)-C(10)-C(9)   | 50.2(2)    |
| C(11)-C(9)-C(10)-C(1)  | 169.8(2)   |
| C(8)-C(9)-C(10)-C(1)   | -65.0(2)   |
| C(11)-C(9)-C(10)-C(19) | -71.4(3)   |
| C(8)-C(9)-C(10)-C(19)  | 53.7(3)    |
| C(11)-C(9)-C(10)-C(13) | 49.5(3)    |
| C(8)-C(9)-C(10)-C(13)  | 174.6(2)   |
| C(8)-C(9)-C(11)-C(12)  | 111.8(3)   |

*Ferris, Hong, Roundtree & Morken, Supporting Information*

|                         |           |
|-------------------------|-----------|
| C(10)-C(9)-C(11)-C(12)  | -123.7(3) |
| C(1)-C(10)-C(13)-C(14)  | 51.3(3)   |
| C(19)-C(10)-C(13)-C(14) | -68.1(3)  |
| C(9)-C(10)-C(13)-C(14)  | 169.7(2)  |
| C(10)-C(13)-C(14)-C(15) | 172.6(2)  |
| C(13)-C(14)-C(15)-C(16) | -154.0(3) |
| C(14)-C(15)-C(16)-C(18) | -175.9(3) |
| C(14)-C(15)-C(16)-C(17) | 2.5(5)    |

---

Symmetry transformations used to generate equivalent atoms:

Table 7. Hydrogen bonds for sad [Å and °].

| D-H...A             | d(D-H)    | d(H...A)  | d(D...A) | <(DHA) |
|---------------------|-----------|-----------|----------|--------|
| O(1)-H(1O)...O(2)#1 | 0.845(18) | 1.892(18) | 2.730(2) | 171(3) |
| O(2)-H(2O)...O(1)#2 | 0.897(18) | 1.855(19) | 2.749(3) | 175(3) |

Symmetry transformations used to generate equivalent atoms:

#1  $-x+2, y-1/2, -z+2$     #2  $x, y+1, z$



**(1*S*,2*R*,3*S*,4*R*)-2-methyl-2-(4-methylpent-3-en-1-yl)-3-vinyl-1,2,3,4-tetrahydronaphthalene-1,4-diol (syn diastereomer of 4c)**

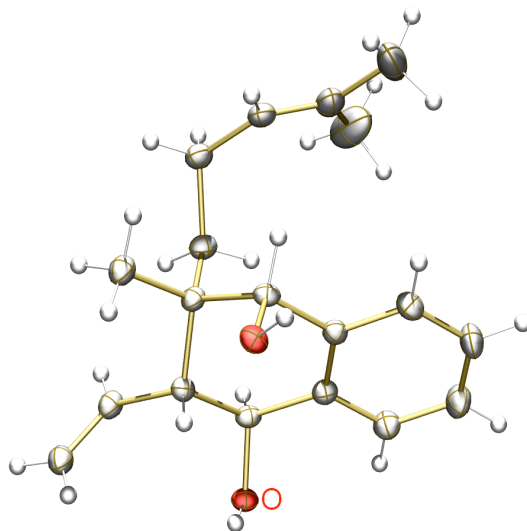

(*S,S*)-di-*iso*-propylTADDOL-PPh used when this crystal was obtained

Table 1. Crystal data and structure refinement for C<sub>19</sub>H<sub>26</sub>O<sub>2</sub>.

|                                 |                                                |                  |
|---------------------------------|------------------------------------------------|------------------|
| Identification code             | C <sub>19</sub> H <sub>26</sub> O <sub>2</sub> |                  |
| Empirical formula               | C <sub>19</sub> H <sub>26</sub> O <sub>2</sub> |                  |
| Formula weight                  | 286.40                                         |                  |
| Temperature                     | 100(2) K                                       |                  |
| Wavelength                      | 1.54178 Å                                      |                  |
| Crystal system                  | Monoclinic                                     |                  |
| Space group                     | P2(1)                                          |                  |
| Unit cell dimensions            | a = 14.6441(14) Å                              | α = 90°.         |
|                                 | b = 6.9021(7) Å                                | β = 106.762(4)°. |
|                                 | c = 16.9049(16) Å                              | γ = 90°.         |
| Volume                          | 1636.1(3) Å <sup>3</sup>                       |                  |
| Z                               | 4                                              |                  |
| Density (calculated)            | 1.163 Mg/m <sup>3</sup>                        |                  |
| Absorption coefficient          | 0.570 mm <sup>-1</sup>                         |                  |
| F(000)                          | 624                                            |                  |
| Crystal size                    | 0.12 x 0.08 x 0.04 mm <sup>3</sup>             |                  |
| Theta range for data collection | 2.73 to 67.34°.                                |                  |
| Index ranges                    | -17 ≤ h ≤ 17, -4 ≤ k ≤ 8, -20 ≤ l ≤ 20         |                  |
| Reflections collected           | 14863                                          |                  |
| Independent reflections         | 3901 [R(int) = 0.0422]                         |                  |
| Completeness to theta = 67.34°  | 97.8 %                                         |                  |
| Absorption correction           | Semi-empirical from equivalents                |                  |

*Ferris, Hong, Roundtree & Morken, Supporting Information*

|                                   |                                             |
|-----------------------------------|---------------------------------------------|
| Max. and min. transmission        | 0.9775 and 0.9347                           |
| Refinement method                 | Full-matrix least-squares on F <sup>2</sup> |
| Data / restraints / parameters    | 3901 / 11 / 415                             |
| Goodness-of-fit on F <sup>2</sup> | 1.027                                       |
| Final R indices [I>2sigma(I)]     | R1 = 0.0337, wR2 = 0.0878                   |
| R indices (all data)              | R1 = 0.0347, wR2 = 0.0888                   |
| Absolute structure parameter      | 0.34(18)                                    |
| Extinction coefficient            | na                                          |
| Largest diff. peak and hole       | 0.175 and -0.225 e.Å <sup>-3</sup>          |

Table 2. Atomic coordinates ( $\times 10^4$ ) and equivalent isotropic displacement parameters ( $\text{\AA}^2 \times 10^3$ )

for C<sub>19</sub>H<sub>26</sub>O<sub>2</sub>. U(eq) is defined as one third of the trace of the orthogonalized U<sup>ij</sup> tensor.

|       | x       | y        | z        | U(eq) |
|-------|---------|----------|----------|-------|
| O(1)  | 575(1)  | 2164(2)  | 4541(1)  | 20(1) |
| O(2)  | 1110(1) | -4177(2) | 5205(1)  | 20(1) |
| C(1)  | 1392(1) | 1415(3)  | 4324(1)  | 18(1) |
| C(2)  | 1058(1) | -123(3)  | 3646(1)  | 19(1) |
| C(3)  | 687(1)  | -1875(3) | 4050(1)  | 18(1) |
| C(4)  | 1487(1) | -2788(3) | 4746(1)  | 19(1) |
| C(5)  | 2118(1) | -1313(3) | 5315(1)  | 19(1) |
| C(6)  | 2757(1) | -1936(3) | 6058(1)  | 26(1) |
| C(7)  | 3378(1) | -646(4)  | 6568(1)  | 31(1) |
| C(8)  | 3379(1) | 1300(3)  | 6342(1)  | 30(1) |
| C(9)  | 2748(1) | 1922(3)  | 5612(1)  | 24(1) |
| C(10) | 2108(1) | 638(3)   | 5094(1)  | 19(1) |
| C(11) | 243(1)  | 694(3)   | 2941(1)  | 25(1) |
| C(12) | 1902(1) | -773(3)  | 3322(1)  | 23(1) |
| C(13) | 2240(1) | 637(3)   | 2758(1)  | 25(1) |
| C(14) | 2695(1) | 2489(3)  | 3153(1)  | 26(1) |
| C(15) | 3577(2) | 2696(4)  | 3651(1)  | 38(1) |
| C(16) | 4270(2) | 1056(7)  | 3885(2)  | 68(1) |
| C(17) | 3908(2) | 4658(6)  | 4033(2)  | 62(1) |
| C(18) | 190(1)  | -3397(3) | 3443(1)  | 22(1) |
| C(19) | -685(1) | -4009(3) | 3358(1)  | 27(1) |
| O(3)  | 5619(1) | 2396(2)  | 9546(1)  | 19(1) |
| O(4)  | 5988(1) | -4101(2) | 10248(1) | 20(1) |
| C(20) | 6553(1) | 1621(3)  | 9636(1)  | 18(1) |
| C(21) | 6488(1) | 97(3)    | 8958(1)  | 18(1) |
| C(22) | 5970(1) | -1705(3) | 9172(1)  | 18(1) |
| C(23) | 6528(1) | -2615(3) | 10000(1) | 18(1) |
| C(24) | 6886(1) | -1136(3) | 10685(1) | 18(1) |
| C(25) | 7193(1) | -1754(3) | 11508(1) | 21(1) |
| C(26) | 7575(1) | -462(3)  | 12140(1) | 24(1) |
| C(27) | 7663(1) | 1485(3)  | 11961(1) | 24(1) |
| C(28) | 7351(1) | 2119(3)  | 11150(1) | 21(1) |

*Ferris, Hong, Roundtree & Morken, Supporting Information*

|       |          |          |          |       |
|-------|----------|----------|----------|-------|
| C(29) | 6955(1)  | 832(3)   | 10506(1) | 18(1) |
| C(30) | 5899(1)  | 909(3)   | 8120(1)  | 21(1) |
| C(31) | 7513(1)  | -417(3)  | 8940(1)  | 19(1) |
| C(32) | 8012(1)  | 1128(3)  | 8555(1)  | 22(1) |
| C(33) | 9000(1)  | 490(3)   | 8579(1)  | 23(1) |
| C(34) | 9818(1)  | 1430(4)  | 8891(1)  | 28(1) |
| C(35) | 9908(2)  | 3408(4)  | 9276(1)  | 44(1) |
| C(36) | 10750(1) | 513(5)   | 8888(1)  | 40(1) |
| C(37) | 5741(1)  | -3219(3) | 8503(1)  | 20(1) |
| C(38) | 4893(1)  | -3985(3) | 8183(1)  | 24(1) |

---

Table 3. Bond lengths [Å] and angles [°] for C<sub>19</sub>H<sub>26</sub>O<sub>2</sub>.

---

|              |           |
|--------------|-----------|
| O(1)-C(1)    | 1.443(2)  |
| O(1)-H(10)   | 0.851(18) |
| O(2)-C(4)    | 1.440(2)  |
| O(2)-H(20)   | 0.860(17) |
| C(1)-C(10)   | 1.515(2)  |
| C(1)-C(2)    | 1.535(3)  |
| C(1)-H(1)    | 0.974(16) |
| C(2)-C(11)   | 1.532(2)  |
| C(2)-C(12)   | 1.555(2)  |
| C(2)-C(3)    | 1.562(3)  |
| C(3)-C(18)   | 1.502(3)  |
| C(3)-C(4)    | 1.536(2)  |
| C(3)-H(3)    | 0.977(16) |
| C(4)-C(5)    | 1.518(3)  |
| C(4)-H(4)    | 0.989(16) |
| C(5)-C(10)   | 1.396(3)  |
| C(5)-C(6)    | 1.400(3)  |
| C(6)-C(7)    | 1.383(3)  |
| C(6)-H(6)    | 0.9500    |
| C(7)-C(8)    | 1.397(3)  |
| C(7)-H(7)    | 0.9500    |
| C(8)-C(9)    | 1.379(3)  |
| C(8)-H(8)    | 0.9500    |
| C(9)-C(10)   | 1.398(3)  |
| C(9)-H(9)    | 0.9500    |
| C(11)-H(11A) | 0.9800    |
| C(11)-H(11B) | 0.9800    |
| C(11)-H(11C) | 0.9800    |
| C(12)-C(13)  | 1.541(3)  |
| C(12)-H(12A) | 0.9900    |
| C(12)-H(12B) | 0.9900    |
| C(13)-C(14)  | 1.506(3)  |
| C(13)-H(13A) | 0.9900    |
| C(13)-H(13B) | 0.9900    |
| C(14)-C(15)  | 1.331(3)  |
| C(14)-H(14)  | 0.9500    |

*Ferris, Hong, Roundtree & Morken, Supporting Information*

|              |           |
|--------------|-----------|
| C(15)-C(16)  | 1.494(5)  |
| C(15)-C(17)  | 1.519(4)  |
| C(16)-H(16A) | 0.9800    |
| C(16)-H(16B) | 0.9800    |
| C(16)-H(16C) | 0.9800    |
| C(17)-H(17A) | 0.9800    |
| C(17)-H(17B) | 0.9800    |
| C(17)-H(17C) | 0.9800    |
| C(18)-C(19)  | 1.317(3)  |
| C(18)-H(18)  | 0.9500    |
| C(19)-H(19A) | 0.9500    |
| C(19)-H(19B) | 0.9500    |
| O(3)-C(20)   | 1.436(2)  |
| O(3)-H(3O)   | 0.822(18) |
| O(4)-C(23)   | 1.430(2)  |
| O(4)-H(4O)   | 0.854(17) |
| C(20)-C(29)  | 1.519(2)  |
| C(20)-C(21)  | 1.538(3)  |
| C(20)-H(20)  | 1.005(16) |
| C(21)-C(30)  | 1.536(2)  |
| C(21)-C(31)  | 1.551(2)  |
| C(21)-C(22)  | 1.553(3)  |
| C(22)-C(37)  | 1.505(3)  |
| C(22)-C(23)  | 1.538(2)  |
| C(22)-H(22)  | 0.991(15) |
| C(23)-C(24)  | 1.518(3)  |
| C(23)-H(23)  | 1.004(16) |
| C(24)-C(25)  | 1.400(2)  |
| C(24)-C(29)  | 1.402(3)  |
| C(25)-C(26)  | 1.380(3)  |
| C(25)-H(25)  | 0.9500    |
| C(26)-C(27)  | 1.392(3)  |
| C(26)-H(26)  | 0.9500    |
| C(27)-C(28)  | 1.385(3)  |
| C(27)-H(27)  | 0.9500    |
| C(28)-C(29)  | 1.395(3)  |
| C(28)-H(28)  | 0.9500    |
| C(30)-H(30A) | 0.9800    |

*Ferris, Hong, Roundtree & Morken, Supporting Information*

|                  |            |
|------------------|------------|
| C(30)-H(30B)     | 0.9800     |
| C(30)-H(30C)     | 0.9800     |
| C(31)-C(32)      | 1.538(3)   |
| C(31)-H(31A)     | 0.9900     |
| C(31)-H(31B)     | 0.9900     |
| C(32)-C(33)      | 1.503(2)   |
| C(32)-H(32A)     | 0.9900     |
| C(32)-H(32B)     | 0.9900     |
| C(33)-C(34)      | 1.330(3)   |
| C(33)-H(33)      | 0.9500     |
| C(34)-C(35)      | 1.502(4)   |
| C(34)-C(36)      | 1.507(3)   |
| C(35)-H(35A)     | 0.9800     |
| C(35)-H(35B)     | 0.9800     |
| C(35)-H(35C)     | 0.9800     |
| C(36)-H(36A)     | 0.9800     |
| C(36)-H(36B)     | 0.9800     |
| C(36)-H(36C)     | 0.9800     |
| C(37)-C(38)      | 1.314(3)   |
| C(37)-H(37)      | 0.9500     |
| C(38)-H(38A)     | 0.9500     |
| C(38)-H(38B)     | 0.9500     |
|                  |            |
| C(1)-O(1)-H(10)  | 108.8(17)  |
| C(4)-O(2)-H(20)  | 105.4(18)  |
| O(1)-C(1)-C(10)  | 109.17(13) |
| O(1)-C(1)-C(2)   | 109.21(14) |
| C(10)-C(1)-C(2)  | 112.87(16) |
| O(1)-C(1)-H(1)   | 106.3(13)  |
| C(10)-C(1)-H(1)  | 109.5(12)  |
| C(2)-C(1)-H(1)   | 109.6(12)  |
| C(11)-C(2)-C(1)  | 109.59(16) |
| C(11)-C(2)-C(12) | 110.64(14) |
| C(1)-C(2)-C(12)  | 110.42(14) |
| C(11)-C(2)-C(3)  | 109.49(15) |
| C(1)-C(2)-C(3)   | 106.55(13) |
| C(12)-C(2)-C(3)  | 110.06(16) |
| C(18)-C(3)-C(4)  | 110.38(16) |

*Ferris, Hong, Roundtree & Morken, Supporting Information*

|                     |            |
|---------------------|------------|
| C(18)-C(3)-C(2)     | 113.87(14) |
| C(4)-C(3)-C(2)      | 111.58(14) |
| C(18)-C(3)-H(3)     | 108.1(13)  |
| C(4)-C(3)-H(3)      | 106.6(12)  |
| C(2)-C(3)-H(3)      | 105.9(15)  |
| O(2)-C(4)-C(5)      | 111.31(13) |
| O(2)-C(4)-C(3)      | 111.10(14) |
| C(5)-C(4)-C(3)      | 113.61(16) |
| O(2)-C(4)-H(4)      | 102.7(14)  |
| C(5)-C(4)-H(4)      | 107.1(13)  |
| C(3)-C(4)-H(4)      | 110.4(12)  |
| C(10)-C(5)-C(6)     | 119.23(18) |
| C(10)-C(5)-C(4)     | 121.37(16) |
| C(6)-C(5)-C(4)      | 119.33(19) |
| C(7)-C(6)-C(5)      | 120.8(2)   |
| C(7)-C(6)-H(6)      | 119.6      |
| C(5)-C(6)-H(6)      | 119.6      |
| C(6)-C(7)-C(8)      | 120.02(18) |
| C(6)-C(7)-H(7)      | 120.0      |
| C(8)-C(7)-H(7)      | 120.0      |
| C(9)-C(8)-C(7)      | 119.4(2)   |
| C(9)-C(8)-H(8)      | 120.3      |
| C(7)-C(8)-H(8)      | 120.3      |
| C(8)-C(9)-C(10)     | 121.2(2)   |
| C(8)-C(9)-H(9)      | 119.4      |
| C(10)-C(9)-H(9)     | 119.4      |
| C(5)-C(10)-C(9)     | 119.38(17) |
| C(5)-C(10)-C(1)     | 121.48(17) |
| C(9)-C(10)-C(1)     | 119.09(18) |
| C(2)-C(11)-H(11A)   | 109.5      |
| C(2)-C(11)-H(11B)   | 109.5      |
| H(11A)-C(11)-H(11B) | 109.5      |
| C(2)-C(11)-H(11C)   | 109.5      |
| H(11A)-C(11)-H(11C) | 109.5      |
| H(11B)-C(11)-H(11C) | 109.5      |
| C(13)-C(12)-C(2)    | 117.76(17) |
| C(13)-C(12)-H(12A)  | 107.9      |
| C(2)-C(12)-H(12A)   | 107.9      |



*Ferris, Hong, Roundtree & Morken, Supporting Information*

|                     |            |
|---------------------|------------|
| C(13)-C(12)-H(12B)  | 107.9      |
| C(2)-C(12)-H(12B)   | 107.9      |
| H(12A)-C(12)-H(12B) | 107.2      |
| C(14)-C(13)-C(12)   | 116.17(15) |
| C(14)-C(13)-H(13A)  | 108.2      |
| C(12)-C(13)-H(13A)  | 108.2      |
| C(14)-C(13)-H(13B)  | 108.2      |
| C(12)-C(13)-H(13B)  | 108.2      |
| H(13A)-C(13)-H(13B) | 107.4      |
| C(15)-C(14)-C(13)   | 126.6(2)   |
| C(15)-C(14)-H(14)   | 116.7      |
| C(13)-C(14)-H(14)   | 116.7      |
| C(14)-C(15)-C(16)   | 123.2(3)   |
| C(14)-C(15)-C(17)   | 119.8(3)   |
| C(16)-C(15)-C(17)   | 117.0(2)   |
| C(15)-C(16)-H(16A)  | 109.5      |
| C(15)-C(16)-H(16B)  | 109.5      |
| H(16A)-C(16)-H(16B) | 109.5      |
| C(15)-C(16)-H(16C)  | 109.5      |
| H(16A)-C(16)-H(16C) | 109.5      |
| H(16B)-C(16)-H(16C) | 109.5      |
| C(15)-C(17)-H(17A)  | 109.5      |
| C(15)-C(17)-H(17B)  | 109.5      |
| H(17A)-C(17)-H(17B) | 109.5      |
| C(15)-C(17)-H(17C)  | 109.5      |
| H(17A)-C(17)-H(17C) | 109.5      |
| H(17B)-C(17)-H(17C) | 109.5      |
| C(19)-C(18)-C(3)    | 124.29(17) |
| C(19)-C(18)-H(18)   | 117.9      |
| C(3)-C(18)-H(18)    | 117.9      |
| C(18)-C(19)-H(19A)  | 120.0      |
| C(18)-C(19)-H(19B)  | 120.0      |
| H(19A)-C(19)-H(19B) | 120.0      |
| C(20)-O(3)-H(3O)    | 106.3(17)  |
| C(23)-O(4)-H(4O)    | 105.4(18)  |
| O(3)-C(20)-C(29)    | 109.15(13) |
| O(3)-C(20)-C(21)    | 108.84(14) |
| C(29)-C(20)-C(21)   | 113.57(16) |

*Ferris, Hong, Roundtree & Morken, Supporting Information*

|                   |            |
|-------------------|------------|
| O(3)-C(20)-H(20)  | 108.4(13)  |
| C(29)-C(20)-H(20) | 108.2(11)  |
| C(21)-C(20)-H(20) | 108.6(12)  |
| C(30)-C(21)-C(20) | 109.60(15) |
| C(30)-C(21)-C(31) | 110.71(13) |
| C(20)-C(21)-C(31) | 108.60(14) |
| C(30)-C(21)-C(22) | 108.97(14) |
| C(20)-C(21)-C(22) | 107.68(14) |
| C(31)-C(21)-C(22) | 111.23(15) |
| C(37)-C(22)-C(23) | 110.22(16) |
| C(37)-C(22)-C(21) | 113.50(14) |
| C(23)-C(22)-C(21) | 111.82(14) |
| C(37)-C(22)-H(22) | 106.4(13)  |
| C(23)-C(22)-H(22) | 107.4(12)  |
| C(21)-C(22)-H(22) | 107.2(15)  |
| O(4)-C(23)-C(24)  | 110.94(13) |
| O(4)-C(23)-C(22)  | 111.44(14) |
| C(24)-C(23)-C(22) | 113.30(16) |
| O(4)-C(23)-H(23)  | 101.3(14)  |
| C(24)-C(23)-H(23) | 107.9(13)  |
| C(22)-C(23)-H(23) | 111.2(11)  |
| C(25)-C(24)-C(29) | 119.16(18) |
| C(25)-C(24)-C(23) | 119.61(18) |
| C(29)-C(24)-C(23) | 121.17(15) |
| C(26)-C(25)-C(24) | 120.97(19) |
| C(26)-C(25)-H(25) | 119.5      |
| C(24)-C(25)-H(25) | 119.5      |
| C(25)-C(26)-C(27) | 119.86(17) |
| C(25)-C(26)-H(26) | 120.1      |
| C(27)-C(26)-H(26) | 120.1      |
| C(28)-C(27)-C(26) | 119.70(19) |
| C(28)-C(27)-H(27) | 120.1      |
| C(26)-C(27)-H(27) | 120.1      |
| C(27)-C(28)-C(29) | 121.0(2)   |
| C(27)-C(28)-H(28) | 119.5      |
| C(29)-C(28)-H(28) | 119.5      |
| C(28)-C(29)-C(24) | 119.25(16) |
| C(28)-C(29)-C(20) | 119.01(18) |

*Ferris, Hong, Roundtree & Morken, Supporting Information*

|                     |            |
|---------------------|------------|
| C(24)-C(29)-C(20)   | 121.63(17) |
| C(21)-C(30)-H(30A)  | 109.5      |
| C(21)-C(30)-H(30B)  | 109.5      |
| H(30A)-C(30)-H(30B) | 109.5      |
| C(21)-C(30)-H(30C)  | 109.5      |
| H(30A)-C(30)-H(30C) | 109.5      |
| H(30B)-C(30)-H(30C) | 109.5      |
| C(32)-C(31)-C(21)   | 115.47(15) |
| C(32)-C(31)-H(31A)  | 108.4      |
| C(21)-C(31)-H(31A)  | 108.4      |
| C(32)-C(31)-H(31B)  | 108.4      |
| C(21)-C(31)-H(31B)  | 108.4      |
| H(31A)-C(31)-H(31B) | 107.5      |
| C(33)-C(32)-C(31)   | 110.92(16) |
| C(33)-C(32)-H(32A)  | 109.5      |
| C(31)-C(32)-H(32A)  | 109.5      |
| C(33)-C(32)-H(32B)  | 109.5      |
| C(31)-C(32)-H(32B)  | 109.5      |
| H(32A)-C(32)-H(32B) | 108.0      |
| C(34)-C(33)-C(32)   | 128.2(2)   |
| C(34)-C(33)-H(33)   | 115.9      |
| C(32)-C(33)-H(33)   | 115.9      |
| C(33)-C(34)-C(35)   | 124.9(2)   |
| C(33)-C(34)-C(36)   | 120.4(2)   |
| C(35)-C(34)-C(36)   | 114.7(2)   |
| C(34)-C(35)-H(35A)  | 109.5      |
| C(34)-C(35)-H(35B)  | 109.5      |
| H(35A)-C(35)-H(35B) | 109.5      |
| C(34)-C(35)-H(35C)  | 109.5      |
| H(35A)-C(35)-H(35C) | 109.5      |
| H(35B)-C(35)-H(35C) | 109.5      |
| C(34)-C(36)-H(36A)  | 109.5      |
| C(34)-C(36)-H(36B)  | 109.5      |
| H(36A)-C(36)-H(36B) | 109.5      |
| C(34)-C(36)-H(36C)  | 109.5      |
| H(36A)-C(36)-H(36C) | 109.5      |
| H(36B)-C(36)-H(36C) | 109.5      |
| C(38)-C(37)-C(22)   | 124.59(17) |

*Ferris, Hong, Roundtree & Morken, Supporting Information*

|                     |       |
|---------------------|-------|
| C(38)-C(37)-H(37)   | 117.7 |
| C(22)-C(37)-H(37)   | 117.7 |
| C(37)-C(38)-H(38A)  | 120.0 |
| C(37)-C(38)-H(38B)  | 120.0 |
| H(38A)-C(38)-H(38B) | 120.0 |

---

Symmetry transformations used to generate equivalent atoms:

Table 4. Anisotropic displacement parameters ( $\text{\AA}^2 \times 10^3$ ) for C19H26O2. The anisotropic displacement factor exponent takes the form:  $-2\pi^2 [h^2 a^{*2} U^{11} + \dots + 2 h k a^* b^* U^{12}]$

|       | U <sup>11</sup> | U <sup>22</sup> | U <sup>33</sup> | U <sup>23</sup> | U <sup>13</sup> | U <sup>12</sup> |
|-------|-----------------|-----------------|-----------------|-----------------|-----------------|-----------------|
| O(1)  | 22(1)           | 14(1)           | 26(1)           | -2(1)           | 8(1)            | 1(1)            |
| O(2)  | 24(1)           | 15(1)           | 23(1)           | 2(1)            | 9(1)            | 0(1)            |
| C(1)  | 20(1)           | 14(1)           | 22(1)           | 2(1)            | 9(1)            | 1(1)            |
| C(2)  | 22(1)           | 18(1)           | 17(1)           | 2(1)            | 5(1)            | 1(1)            |
| C(3)  | 20(1)           | 16(1)           | 19(1)           | -2(1)           | 7(1)            | 0(1)            |
| C(4)  | 23(1)           | 15(1)           | 20(1)           | 1(1)            | 10(1)           | 0(1)            |
| C(5)  | 20(1)           | 19(1)           | 20(1)           | 0(1)            | 8(1)            | 2(1)            |
| C(6)  | 27(1)           | 23(1)           | 26(1)           | 2(1)            | 6(1)            | 1(1)            |
| C(7)  | 28(1)           | 34(1)           | 25(1)           | 3(1)            | -2(1)           | 1(1)            |
| C(8)  | 28(1)           | 29(1)           | 28(1)           | -6(1)           | 0(1)            | -6(1)           |
| C(9)  | 25(1)           | 18(1)           | 28(1)           | -1(1)           | 8(1)            | -2(1)           |
| C(10) | 20(1)           | 19(1)           | 20(1)           | -1(1)           | 8(1)            | -1(1)           |
| C(11) | 29(1)           | 22(1)           | 21(1)           | 1(1)            | 4(1)            | 0(1)            |
| C(12) | 29(1)           | 19(1)           | 22(1)           | 0(1)            | 11(1)           | 0(1)            |
| C(13) | 30(1)           | 27(1)           | 22(1)           | 0(1)            | 11(1)           | -3(1)           |
| C(14) | 29(1)           | 28(1)           | 22(1)           | 2(1)            | 11(1)           | -5(1)           |
| C(15) | 34(1)           | 58(2)           | 24(1)           | 2(1)            | 10(1)           | -14(1)          |
| C(16) | 29(1)           | 120(3)          | 52(1)           | 30(2)           | 8(1)            | 9(2)            |
| C(17) | 60(2)           | 93(3)           | 35(1)           | -18(1)          | 20(1)           | -48(2)          |
| C(18) | 28(1)           | 18(1)           | 19(1)           | -2(1)           | 6(1)            | 1(1)            |
| C(19) | 30(1)           | 24(1)           | 22(1)           | 0(1)            | 4(1)            | -6(1)           |
| O(3)  | 18(1)           | 15(1)           | 25(1)           | -1(1)           | 7(1)            | 2(1)            |
| O(4)  | 21(1)           | 15(1)           | 28(1)           | 0(1)            | 10(1)           | -1(1)           |
| C(20) | 16(1)           | 15(1)           | 23(1)           | 1(1)            | 7(1)            | 0(1)            |
| C(21) | 17(1)           | 17(1)           | 19(1)           | 0(1)            | 6(1)            | 0(1)            |
| C(22) | 16(1)           | 16(1)           | 22(1)           | -1(1)           | 7(1)            | 1(1)            |
| C(23) | 17(1)           | 15(1)           | 24(1)           | 0(1)            | 8(1)            | -1(1)           |
| C(24) | 14(1)           | 19(1)           | 23(1)           | 0(1)            | 7(1)            | 1(1)            |
| C(25) | 19(1)           | 20(1)           | 24(1)           | 2(1)            | 6(1)            | 3(1)            |
| C(26) | 21(1)           | 30(1)           | 19(1)           | 2(1)            | 3(1)            | 4(1)            |
| C(27) | 19(1)           | 27(1)           | 24(1)           | -7(1)           | 3(1)            | -2(1)           |
| C(28) | 18(1)           | 18(1)           | 27(1)           | -2(1)           | 6(1)            | -1(1)           |
| C(29) | 14(1)           | 20(1)           | 21(1)           | -2(1)           | 7(1)            | 0(1)            |

*Ferris, Hong, Roundtree & Morken, Supporting Information*

|       |       |       |       |        |      |        |
|-------|-------|-------|-------|--------|------|--------|
| C(30) | 19(1) | 20(1) | 22(1) | -1(1)  | 5(1) | 1(1)   |
| C(31) | 19(1) | 17(1) | 20(1) | -1(1)  | 6(1) | 0(1)   |
| C(32) | 24(1) | 20(1) | 24(1) | 1(1)   | 9(1) | 0(1)   |
| C(33) | 24(1) | 26(1) | 20(1) | 0(1)   | 9(1) | 0(1)   |
| C(34) | 25(1) | 43(1) | 17(1) | 2(1)   | 6(1) | -7(1)  |
| C(35) | 41(1) | 51(2) | 37(1) | -13(1) | 9(1) | -20(1) |
| C(36) | 22(1) | 64(2) | 32(1) | 1(1)   | 8(1) | -6(1)  |
| C(37) | 22(1) | 16(1) | 22(1) | -1(1)  | 6(1) | 1(1)   |
| C(38) | 26(1) | 20(1) | 25(1) | -1(1)  | 4(1) | 0(1)   |

---

Table 5. Hydrogen coordinates ( $\times 10^4$ ) and isotropic displacement parameters ( $\text{\AA}^2 \times 10^{-3}$ ) for C19H26O2.

|        | x        | y         | z         | U(eq) |
|--------|----------|-----------|-----------|-------|
| H(1O)  | 692(17)  | 3320(30)  | 4713(14)  | 30    |
| H(2O)  | 618(13)  | -3630(40) | 5289(13)  | 31    |
| H(1)   | 1669(14) | 2510(30)  | 4111(12)  | 22    |
| H(3)   | 226(13)  | -1340(40) | 4309(12)  | 22    |
| H(4)   | 1905(14) | -3590(30) | 4512(12)  | 23    |
| H(6)   | 2763     | -3259     | 6213      | 31    |
| H(7)   | 3805     | -1084     | 7073      | 37    |
| H(8)   | 3810     | 2188      | 6688      | 36    |
| H(9)   | 2747     | 3246      | 5458      | 29    |
| H(11A) | -326     | 857       | 3130      | 37    |
| H(11B) | 100      | -203      | 2472      | 37    |
| H(11C) | 431      | 1953      | 2769      | 37    |
| H(12A) | 2453     | -1058     | 3807      | 27    |
| H(12B) | 1718     | -2003     | 3017      | 27    |
| H(13A) | 2705     | -51       | 2534      | 30    |
| H(13B) | 1685     | 975       | 2285      | 30    |
| H(14)  | 2313     | 3624      | 3036      | 31    |
| H(16A) | 4026     | -60       | 3528      | 101   |
| H(16B) | 4352     | 699       | 4462      | 101   |
| H(16C) | 4885     | 1455      | 3817      | 101   |
| H(17A) | 3416     | 5631      | 3802      | 92    |
| H(17B) | 4500     | 5024      | 3912      | 92    |
| H(17C) | 4022     | 4586      | 4633      | 92    |
| H(18)  | 529      | -3956     | 3098      | 26    |
| H(19A) | -1044    | -3480     | 3693      | 32    |
| H(19B) | -957     | -4979     | 2961      | 32    |
| H(3O)  | 5698(17) | 3500(30)  | 9738(14)  | 29    |
| H(4O)  | 5496(13) | -3530(40) | 10313(13) | 31    |
| H(20)  | 6977(13) | 2700(30)  | 9558(12)  | 21    |
| H(22)  | 5350(12) | -1250(40) | 9231(12)  | 21    |
| H(23)  | 7093(13) | -3370(30) | 9945(12)  | 22    |
| H(25)  | 7138     | -3083     | 11634     | 26    |

*Ferris, Hong, Roundtree & Morken, Supporting Information*

|        |       |       |       |    |
|--------|-------|-------|-------|----|
| H(26)  | 7777  | -900  | 12696 | 29 |
| H(27)  | 7937  | 2376  | 12393 | 28 |
| H(28)  | 7406  | 3451  | 11030 | 26 |
| H(30A) | 5228  | 999   | 8109  | 31 |
| H(30B) | 5959  | 46    | 7677  | 31 |
| H(30C) | 6136  | 2200  | 8039  | 31 |
| H(31A) | 7909  | -660  | 9513  | 22 |
| H(31B) | 7486  | -1639 | 8627  | 22 |
| H(32A) | 7634  | 1361  | 7975  | 26 |
| H(32B) | 8047  | 2360  | 8863  | 26 |
| H(33)  | 9047  | -740  | 8341  | 27 |
| H(35A) | 9275  | 3999  | 9162  | 65 |
| H(35B) | 10315 | 4220  | 9043  | 65 |
| H(35C) | 10193 | 3295  | 9875  | 65 |
| H(36A) | 10630 | -773  | 8633  | 59 |
| H(36B) | 11161 | 387   | 9456  | 59 |
| H(36C) | 11067 | 1327  | 8571  | 59 |
| H(37)  | 6245  | -3650 | 8297  | 24 |
| H(38A) | 4372  | -3588 | 8374  | 29 |
| H(38B) | 4800  | -4937 | 7761  | 29 |

---



Table 6. Torsion angles [°] for C19H26O2.

---

|                        |             |
|------------------------|-------------|
| O(1)-C(1)-C(2)-C(11)   | 50.83(18)   |
| C(10)-C(1)-C(2)-C(11)  | 172.46(15)  |
| O(1)-C(1)-C(2)-C(12)   | 172.95(14)  |
| C(10)-C(1)-C(2)-C(12)  | -65.42(18)  |
| O(1)-C(1)-C(2)-C(3)    | -67.55(17)  |
| C(10)-C(1)-C(2)-C(3)   | 54.08(18)   |
| C(11)-C(2)-C(3)-C(18)  | 52.5(2)     |
| C(1)-C(2)-C(3)-C(18)   | 170.97(14)  |
| C(12)-C(2)-C(3)-C(18)  | -69.29(18)  |
| C(11)-C(2)-C(3)-C(4)   | 178.29(15)  |
| C(1)-C(2)-C(3)-C(4)    | -63.27(18)  |
| C(12)-C(2)-C(3)-C(4)   | 56.47(18)   |
| C(18)-C(3)-C(4)-O(2)   | -62.15(18)  |
| C(2)-C(3)-C(4)-O(2)    | 170.18(14)  |
| C(18)-C(3)-C(4)-C(5)   | 171.42(14)  |
| C(2)-C(3)-C(4)-C(5)    | 43.75(18)   |
| O(2)-C(4)-C(5)-C(10)   | -141.30(16) |
| C(3)-C(4)-C(5)-C(10)   | -15.0(2)    |
| O(2)-C(4)-C(5)-C(6)    | 41.8(2)     |
| C(3)-C(4)-C(5)-C(6)    | 168.13(15)  |
| C(10)-C(5)-C(6)-C(7)   | -0.5(3)     |
| C(4)-C(5)-C(6)-C(7)    | 176.45(17)  |
| C(5)-C(6)-C(7)-C(8)    | -0.5(3)     |
| C(6)-C(7)-C(8)-C(9)    | 0.8(3)      |
| C(7)-C(8)-C(9)-C(10)   | -0.1(3)     |
| C(6)-C(5)-C(10)-C(9)   | 1.2(3)      |
| C(4)-C(5)-C(10)-C(9)   | -175.72(15) |
| C(6)-C(5)-C(10)-C(1)   | -176.16(15) |
| C(4)-C(5)-C(10)-C(1)   | 6.9(2)      |
| C(8)-C(9)-C(10)-C(5)   | -0.9(3)     |
| C(8)-C(9)-C(10)-C(1)   | 176.50(16)  |
| O(1)-C(1)-C(10)-C(5)   | 93.69(19)   |
| C(2)-C(1)-C(10)-C(5)   | -28.0(2)    |
| O(1)-C(1)-C(10)-C(9)   | -83.7(2)    |
| C(2)-C(1)-C(10)-C(9)   | 154.70(16)  |
| C(11)-C(2)-C(12)-C(13) | 47.4(2)     |

*Ferris, Hong, Roundtree & Morken, Supporting Information*

|                         |             |
|-------------------------|-------------|
| C(1)-C(2)-C(12)-C(13)   | -74.1(2)    |
| C(3)-C(2)-C(12)-C(13)   | 168.50(15)  |
| C(2)-C(12)-C(13)-C(14)  | 66.8(2)     |
| C(12)-C(13)-C(14)-C(15) | 77.3(2)     |
| C(13)-C(14)-C(15)-C(16) | 0.9(3)      |
| C(13)-C(14)-C(15)-C(17) | -176.89(18) |
| C(4)-C(3)-C(18)-C(19)   | 109.5(2)    |
| C(2)-C(3)-C(18)-C(19)   | -124.1(2)   |
| O(3)-C(20)-C(21)-C(30)  | 47.14(18)   |
| C(29)-C(20)-C(21)-C(30) | 168.94(14)  |
| O(3)-C(20)-C(21)-C(31)  | 168.20(14)  |
| C(29)-C(20)-C(21)-C(31) | -70.00(18)  |
| O(3)-C(20)-C(21)-C(22)  | -71.25(17)  |
| C(29)-C(20)-C(21)-C(22) | 50.55(18)   |
| C(30)-C(21)-C(22)-C(37) | 53.68(19)   |
| C(20)-C(21)-C(22)-C(37) | 172.49(14)  |
| C(31)-C(21)-C(22)-C(37) | -68.64(18)  |
| C(30)-C(21)-C(22)-C(23) | 179.14(14)  |
| C(20)-C(21)-C(22)-C(23) | -62.05(18)  |
| C(31)-C(21)-C(22)-C(23) | 56.82(18)   |
| C(37)-C(22)-C(23)-O(4)  | -60.79(18)  |
| C(21)-C(22)-C(23)-O(4)  | 171.97(14)  |
| C(37)-C(22)-C(23)-C(24) | 173.25(14)  |
| C(21)-C(22)-C(23)-C(24) | 46.00(18)   |
| O(4)-C(23)-C(24)-C(25)  | 38.0(2)     |
| C(22)-C(23)-C(24)-C(25) | 164.21(15)  |
| O(4)-C(23)-C(24)-C(29)  | -144.89(16) |
| C(22)-C(23)-C(24)-C(29) | -18.7(2)    |
| C(29)-C(24)-C(25)-C(26) | -1.1(3)     |
| C(23)-C(24)-C(25)-C(26) | 176.09(15)  |
| C(24)-C(25)-C(26)-C(27) | -0.4(3)     |
| C(25)-C(26)-C(27)-C(28) | 1.2(3)      |
| C(26)-C(27)-C(28)-C(29) | -0.6(3)     |
| C(27)-C(28)-C(29)-C(24) | -0.8(2)     |
| C(27)-C(28)-C(29)-C(20) | 175.34(15)  |
| C(25)-C(24)-C(29)-C(28) | 1.7(2)      |
| C(23)-C(24)-C(29)-C(28) | -175.47(15) |
| C(25)-C(24)-C(29)-C(20) | -174.40(15) |

*Ferris, Hong, Roundtree & Morken, Supporting Information*

|                         |            |
|-------------------------|------------|
| C(23)-C(24)-C(29)-C(20) | 8.5(2)     |
| O(3)-C(20)-C(29)-C(28)  | -79.93(19) |
| C(21)-C(20)-C(29)-C(28) | 158.44(15) |
| O(3)-C(20)-C(29)-C(24)  | 96.15(19)  |
| C(21)-C(20)-C(29)-C(24) | -25.5(2)   |
| C(30)-C(21)-C(31)-C(32) | 46.0(2)    |
| C(20)-C(21)-C(31)-C(32) | -74.32(18) |
| C(22)-C(21)-C(31)-C(32) | 167.35(14) |
| C(21)-C(31)-C(32)-C(33) | 179.32(15) |
| C(31)-C(32)-C(33)-C(34) | -126.1(2)  |
| C(32)-C(33)-C(34)-C(35) | -1.6(3)    |
| C(32)-C(33)-C(34)-C(36) | 177.55(18) |
| C(23)-C(22)-C(37)-C(38) | 105.4(2)   |
| C(21)-C(22)-C(37)-C(38) | -128.3(2)  |

---

Symmetry transformations used to generate equivalent atoms:

Table 7. Hydrogen bonds for C<sub>19</sub>H<sub>26</sub>O<sub>2</sub> [Å and °].

| D-H...A             | d(D-H)    | d(H...A)  | d(D...A)   | <(DHA) |
|---------------------|-----------|-----------|------------|--------|
| O(1)-H(1O)...O(2)#1 | 0.851(18) | 1.936(18) | 2.782(2)   | 172(2) |
| O(2)-H(2O)...O(1)#2 | 0.860(17) | 1.931(17) | 2.7823(18) | 170(3) |
| O(3)-H(3O)...O(4)#1 | 0.822(18) | 1.860(18) | 2.6791(19) | 174(2) |
| O(4)-H(4O)...O(3)#3 | 0.854(17) | 1.832(17) | 2.6826(18) | 173(3) |

Symmetry transformations used to generate equivalent atoms:

#1  $x, y+1, z$     #2  $-x, y-1/2, -z+1$     #3  $-x+1, y-1/2, -z+2$

**(1*R*,4*S*,5*S*)-5-vinylspiro[5.5]undecane-1,4-diol (4f)**

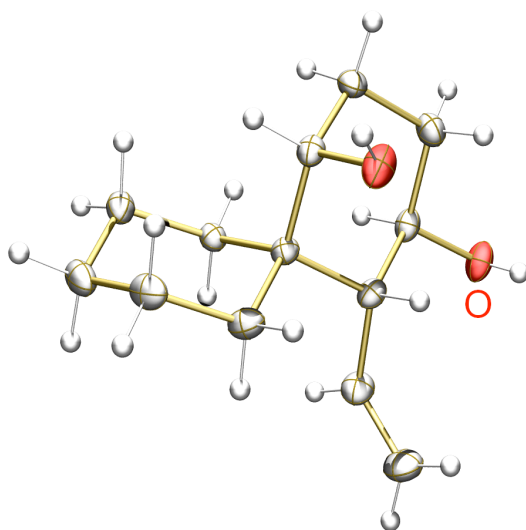

(*S,S*)-di-*iso*-propylTADDOL-PPh used when this crystal was obtained

Table 1. Crystal data and structure refinement for sad.

|                                 |                                    |                               |
|---------------------------------|------------------------------------|-------------------------------|
| Identification code             | C13H22O2                           |                               |
| Empirical formula               | C13 H22 O2                         |                               |
| Formula weight                  | 210.31                             |                               |
| Temperature                     | 100(2) K                           |                               |
| Wavelength                      | 1.54178 Å                          |                               |
| Crystal system                  | Monoclinic                         |                               |
| Space group                     | P 21                               |                               |
| Unit cell dimensions            | a = 7.9329(3) Å                    | $\alpha = 90^\circ$ .         |
|                                 | b = 7.1935(3) Å                    | $\beta = 90.3910(10)^\circ$ . |
|                                 | c = 10.3786(4) Å                   | $\gamma = 90^\circ$ .         |
| Volume                          | 592.24(4) Å <sup>3</sup>           |                               |
| Z                               | 2                                  |                               |
| Density (calculated)            | 1.179 Mg/m <sup>3</sup>            |                               |
| Absorption coefficient          | 0.605 mm <sup>-1</sup>             |                               |
| F(000)                          | 232                                |                               |
| Crystal size                    | 0.16 x 0.10 x 0.06 mm <sup>3</sup> |                               |
| Theta range for data collection | 4.26 to 67.51°.                    |                               |
| Index ranges                    | -9<=h<=8, -8<=k<=8, -12<=l<=12     |                               |
| Reflections collected           | 5618                               |                               |
| Independent reflections         | 2067 [R(int) = 0.0261]             |                               |
| Completeness to theta = 67.51°  | 98.7 %                             |                               |
| Absorption correction           | Semi-empirical from equivalents    |                               |
| Max. and min. transmission      | 0.9646 and 0.9094                  |                               |

*Ferris, Hong, Roundtree & Morken, Supporting Information*

|                                   |                                             |
|-----------------------------------|---------------------------------------------|
| Refinement method                 | Full-matrix least-squares on F <sup>2</sup> |
| Data / restraints / parameters    | 2067 / 3 / 142                              |
| Goodness-of-fit on F <sup>2</sup> | 1.048                                       |
| Final R indices [I>2sigma(I)]     | R1 = 0.0296, wR2 = 0.0792                   |
| R indices (all data)              | R1 = 0.0299, wR2 = 0.0793                   |
| Absolute structure parameter      | 0.18(18)                                    |
| Extinction coefficient            | na                                          |
| Largest diff. peak and hole       | 0.191 and -0.156 e.Å <sup>-3</sup>          |

Table 2. Atomic coordinates ( $\times 10^4$ ) and equivalent isotropic displacement parameters ( $\text{\AA}^2 \times 10^3$ )

for sad.  $U(\text{eq})$  is defined as one third of the trace of the orthogonalized  $U^{ij}$  tensor.

|       | x       | y        | z       | U(eq) |
|-------|---------|----------|---------|-------|
| O(1)  | 5229(1) | 4949(1)  | 3638(1) | 27(1) |
| O(2)  | 4686(1) | 11258(1) | 3885(1) | 26(1) |
| C(1)  | 5238(2) | 5766(2)  | 2377(1) | 19(1) |
| C(2)  | 3574(2) | 6790(2)  | 2153(1) | 22(1) |
| C(3)  | 3388(2) | 8456(2)  | 3056(1) | 24(1) |
| C(4)  | 4910(2) | 9742(2)  | 3010(1) | 20(1) |
| C(5)  | 6561(2) | 8676(2)  | 3273(1) | 18(1) |
| C(6)  | 6787(2) | 7072(2)  | 2271(1) | 17(1) |
| C(7)  | 8037(2) | 9988(2)  | 3348(1) | 25(1) |
| C(8)  | 8921(2) | 10330(2) | 4401(2) | 32(1) |
| C(9)  | 6945(2) | 7859(2)  | 889(1)  | 18(1) |
| C(10) | 7393(2) | 6405(2)  | -124(1) | 22(1) |
| C(11) | 8991(2) | 5343(2)  | 236(1)  | 27(1) |
| C(12) | 8835(2) | 4498(2)  | 1575(1) | 26(1) |
| C(13) | 8412(2) | 5980(2)  | 2583(1) | 23(1) |

Table 3. Bond lengths [Å] and angles [°] for *sad*.

---

|              |            |
|--------------|------------|
| O(1)-C(1)    | 1.4351(15) |
| O(1)-H(1O)   | 0.796(16)  |
| O(2)-C(4)    | 1.4311(15) |
| O(2)-H(2O)   | 0.809(14)  |
| C(1)-C(2)    | 1.5282(17) |
| C(1)-C(6)    | 1.5505(15) |
| C(1)-H(1)    | 1.0000     |
| C(2)-C(3)    | 1.5293(18) |
| C(2)-H(2A)   | 0.9900     |
| C(2)-H(2B)   | 0.9900     |
| C(3)-C(4)    | 1.5221(17) |
| C(3)-H(3A)   | 0.9900     |
| C(3)-H(3B)   | 0.9900     |
| C(4)-C(5)    | 1.5414(17) |
| C(4)-H(4)    | 1.0000     |
| C(5)-C(7)    | 1.5056(17) |
| C(5)-C(6)    | 1.5646(16) |
| C(5)-H(5)    | 1.0000     |
| C(6)-C(13)   | 1.5426(16) |
| C(6)-C(9)    | 1.5482(16) |
| C(7)-C(8)    | 1.318(2)   |
| C(7)-H(7A)   | 0.9500     |
| C(8)-H(8A)   | 0.9500     |
| C(8)-H(8C)   | 0.9500     |
| C(9)-C(10)   | 1.5267(17) |
| C(9)-H(9A)   | 0.9900     |
| C(9)-H(9B)   | 0.9900     |
| C(10)-C(11)  | 1.5245(18) |
| C(10)-H(10A) | 0.9900     |
| C(10)-H(10C) | 0.9900     |
| C(11)-C(12)  | 1.522(2)   |
| C(11)-H(11A) | 0.9900     |
| C(11)-H(11B) | 0.9900     |
| C(12)-C(13)  | 1.5325(18) |
| C(12)-H(12A) | 0.9900     |
| C(12)-H(12B) | 0.9900     |



*Ferris, Hong, Roundtree & Morken, Supporting Information*

|                  |            |
|------------------|------------|
| C(13)-H(13A)     | 0.9900     |
| C(13)-H(13B)     | 0.9900     |
| C(1)-O(1)-H(1O)  | 108.9(14)  |
| C(4)-O(2)-H(2O)  | 110.0(14)  |
| O(1)-C(1)-C(2)   | 109.04(10) |
| O(1)-C(1)-C(6)   | 108.76(9)  |
| C(2)-C(1)-C(6)   | 112.41(10) |
| O(1)-C(1)-H(1)   | 108.9      |
| C(2)-C(1)-H(1)   | 108.9      |
| C(6)-C(1)-H(1)   | 108.9      |
| C(1)-C(2)-C(3)   | 111.80(10) |
| C(1)-C(2)-H(2A)  | 109.3      |
| C(3)-C(2)-H(2A)  | 109.3      |
| C(1)-C(2)-H(2B)  | 109.3      |
| C(3)-C(2)-H(2B)  | 109.3      |
| H(2A)-C(2)-H(2B) | 107.9      |
| C(4)-C(3)-C(2)   | 112.14(10) |
| C(4)-C(3)-H(3A)  | 109.2      |
| C(2)-C(3)-H(3A)  | 109.2      |
| C(4)-C(3)-H(3B)  | 109.2      |
| C(2)-C(3)-H(3B)  | 109.2      |
| H(3A)-C(3)-H(3B) | 107.9      |
| O(2)-C(4)-C(3)   | 109.95(10) |
| O(2)-C(4)-C(5)   | 112.06(10) |
| C(3)-C(4)-C(5)   | 111.42(10) |
| O(2)-C(4)-H(4)   | 107.7      |
| C(3)-C(4)-H(4)   | 107.7      |
| C(5)-C(4)-H(4)   | 107.7      |
| C(7)-C(5)-C(4)   | 110.90(10) |
| C(7)-C(5)-C(6)   | 113.85(10) |
| C(4)-C(5)-C(6)   | 110.48(10) |
| C(7)-C(5)-H(5)   | 107.1      |
| C(4)-C(5)-H(5)   | 107.1      |
| C(6)-C(5)-H(5)   | 107.1      |
| C(13)-C(6)-C(9)  | 107.93(9)  |
| C(13)-C(6)-C(1)  | 109.78(10) |
| C(9)-C(6)-C(1)   | 110.88(9)  |

*Ferris, Hong, Roundtree & Morken, Supporting Information*

|                     |            |
|---------------------|------------|
| C(13)-C(6)-C(5)     | 109.57(9)  |
| C(9)-C(6)-C(5)      | 110.87(10) |
| C(1)-C(6)-C(5)      | 107.79(9)  |
| C(8)-C(7)-C(5)      | 124.65(13) |
| C(8)-C(7)-H(7A)     | 117.7      |
| C(5)-C(7)-H(7A)     | 117.7      |
| C(7)-C(8)-H(8A)     | 120.0      |
| C(7)-C(8)-H(8C)     | 120.0      |
| H(8A)-C(8)-H(8C)    | 120.0      |
| C(10)-C(9)-C(6)     | 114.06(10) |
| C(10)-C(9)-H(9A)    | 108.7      |
| C(6)-C(9)-H(9A)     | 108.7      |
| C(10)-C(9)-H(9B)    | 108.7      |
| C(6)-C(9)-H(9B)     | 108.7      |
| H(9A)-C(9)-H(9B)    | 107.6      |
| C(11)-C(10)-C(9)    | 111.84(10) |
| C(11)-C(10)-H(10A)  | 109.2      |
| C(9)-C(10)-H(10A)   | 109.2      |
| C(11)-C(10)-H(10C)  | 109.2      |
| C(9)-C(10)-H(10C)   | 109.2      |
| H(10A)-C(10)-H(10C) | 107.9      |
| C(12)-C(11)-C(10)   | 110.55(10) |
| C(12)-C(11)-H(11A)  | 109.5      |
| C(10)-C(11)-H(11A)  | 109.5      |
| C(12)-C(11)-H(11B)  | 109.5      |
| C(10)-C(11)-H(11B)  | 109.5      |
| H(11A)-C(11)-H(11B) | 108.1      |
| C(11)-C(12)-C(13)   | 111.41(11) |
| C(11)-C(12)-H(12A)  | 109.3      |
| C(13)-C(12)-H(12A)  | 109.3      |
| C(11)-C(12)-H(12B)  | 109.3      |
| C(13)-C(12)-H(12B)  | 109.3      |
| H(12A)-C(12)-H(12B) | 108.0      |
| C(12)-C(13)-C(6)    | 113.41(10) |
| C(12)-C(13)-H(13A)  | 108.9      |
| C(6)-C(13)-H(13A)   | 108.9      |
| C(12)-C(13)-H(13B)  | 108.9      |
| C(6)-C(13)-H(13B)   | 108.9      |

H(13A)-C(13)-H(13B)      107.7

---

Symmetry transformations used to generate equivalent atoms:

Table 4. Anisotropic displacement parameters ( $\text{\AA}^2 \times 10^3$ ) for sad. The anisotropic displacement factor exponent takes the form:  $-2\pi^2 [ h^2 a^{*2} U^{11} + \dots + 2 h k a^* b^* U^{12} ]$

|       | U <sup>11</sup> | U <sup>22</sup> | U <sup>33</sup> | U <sup>23</sup> | U <sup>13</sup> | U <sup>12</sup> |
|-------|-----------------|-----------------|-----------------|-----------------|-----------------|-----------------|
| O(1)  | 44(1)           | 16(1)           | 21(1)           | 2(1)            | 4(1)            | -6(1)           |
| O(2)  | 40(1)           | 16(1)           | 21(1)           | -2(1)           | 3(1)            | 4(1)            |
| C(1)  | 23(1)           | 15(1)           | 18(1)           | 0(1)            | 2(1)            | -3(1)           |
| C(2)  | 18(1)           | 22(1)           | 25(1)           | -3(1)           | 2(1)            | -4(1)           |
| C(3)  | 21(1)           | 23(1)           | 26(1)           | -1(1)           | 4(1)            | 2(1)            |
| C(4)  | 27(1)           | 14(1)           | 18(1)           | -2(1)           | 2(1)            | 2(1)            |
| C(5)  | 24(1)           | 14(1)           | 18(1)           | 0(1)            | -1(1)           | -2(1)           |
| C(6)  | 18(1)           | 13(1)           | 18(1)           | -1(1)           | -1(1)           | 0(1)            |
| C(7)  | 28(1)           | 18(1)           | 28(1)           | -1(1)           | 1(1)            | -5(1)           |
| C(8)  | 30(1)           | 28(1)           | 38(1)           | -7(1)           | -6(1)           | -5(1)           |
| C(9)  | 17(1)           | 16(1)           | 20(1)           | 0(1)            | 2(1)            | 0(1)            |
| C(10) | 24(1)           | 20(1)           | 22(1)           | -1(1)           | 4(1)            | -3(1)           |
| C(11) | 22(1)           | 21(1)           | 38(1)           | -7(1)           | 7(1)            | 0(1)            |
| C(12) | 22(1)           | 17(1)           | 38(1)           | -4(1)           | -2(1)           | 4(1)            |
| C(13) | 22(1)           | 19(1)           | 28(1)           | -1(1)           | -6(1)           | 2(1)            |

Table 5. Hydrogen coordinates ( $\times 10^4$ ) and isotropic displacement parameters ( $\text{\AA}^2 \times 10^{-3}$ ) for sad.

|        | x        | y         | z        | U(eq) |
|--------|----------|-----------|----------|-------|
| H(1O)  | 5120(20) | 3850(20)  | 3568(19) | 40    |
| H(2O)  | 4670(20) | 10880(30) | 4619(14) | 39    |
| H(1)   | 5343     | 4754      | 1722     | 22    |
| H(2A)  | 2626     | 5920      | 2291     | 26    |
| H(2B)  | 3518     | 7225      | 1249     | 26    |
| H(3A)  | 2364     | 9164      | 2812     | 28    |
| H(3B)  | 3241     | 8003      | 3949     | 28    |
| H(4)   | 4973     | 10269     | 2120     | 23    |
| H(5)   | 6452     | 8082      | 4140     | 22    |
| H(7A)  | 8354     | 10615     | 2581     | 30    |
| H(8A)  | 8641     | 9729      | 5186     | 38    |
| H(8C)  | 9839     | 11178     | 4376     | 38    |
| H(9A)  | 5863     | 8450      | 642      | 21    |
| H(9B)  | 7822     | 8839      | 890      | 21    |
| H(10A) | 6447     | 5517      | -217     | 26    |
| H(10C) | 7555     | 7026      | -965     | 26    |
| H(11A) | 9188     | 4344      | -401     | 32    |
| H(11B) | 9969     | 6197      | 217      | 32    |
| H(12A) | 9910     | 3884      | 1814     | 31    |
| H(12B) | 7940     | 3539      | 1565     | 31    |
| H(13A) | 9365     | 6865      | 2649     | 28    |
| H(13B) | 8288     | 5371      | 3433     | 28    |

Table 6. Torsion angles [°] for *sad*.

|                         |             |
|-------------------------|-------------|
| O(1)-C(1)-C(2)-C(3)     | 65.73(13)   |
| C(6)-C(1)-C(2)-C(3)     | -54.96(13)  |
| C(1)-C(2)-C(3)-C(4)     | 52.25(14)   |
| C(2)-C(3)-C(4)-O(2)     | -179.07(10) |
| C(2)-C(3)-C(4)-C(5)     | -54.21(14)  |
| O(2)-C(4)-C(5)-C(7)     | -51.03(14)  |
| C(3)-C(4)-C(5)-C(7)     | -174.69(10) |
| O(2)-C(4)-C(5)-C(6)     | -178.23(10) |
| C(3)-C(4)-C(5)-C(6)     | 58.10(13)   |
| O(1)-C(1)-C(6)-C(13)    | 55.92(12)   |
| C(2)-C(1)-C(6)-C(13)    | 176.77(10)  |
| O(1)-C(1)-C(6)-C(9)     | 175.09(10)  |
| C(2)-C(1)-C(6)-C(9)     | -64.06(13)  |
| O(1)-C(1)-C(6)-C(5)     | -63.38(12)  |
| C(2)-C(1)-C(6)-C(5)     | 57.47(12)   |
| C(7)-C(5)-C(6)-C(13)    | 56.50(13)   |
| C(4)-C(5)-C(6)-C(13)    | -177.95(10) |
| C(7)-C(5)-C(6)-C(9)     | -62.54(13)  |
| C(4)-C(5)-C(6)-C(9)     | 63.02(12)   |
| C(7)-C(5)-C(6)-C(1)     | 175.92(10)  |
| C(4)-C(5)-C(6)-C(1)     | -58.52(12)  |
| C(4)-C(5)-C(7)-C(8)     | 112.86(15)  |
| C(6)-C(5)-C(7)-C(8)     | -121.81(15) |
| C(13)-C(6)-C(9)-C(10)   | 52.55(13)   |
| C(1)-C(6)-C(9)-C(10)    | -67.72(12)  |
| C(5)-C(6)-C(9)-C(10)    | 172.57(10)  |
| C(6)-C(9)-C(10)-C(11)   | -54.72(14)  |
| C(9)-C(10)-C(11)-C(12)  | 54.39(14)   |
| C(10)-C(11)-C(12)-C(13) | -55.40(14)  |
| C(11)-C(12)-C(13)-C(6)  | 56.87(14)   |
| C(9)-C(6)-C(13)-C(12)   | -53.46(13)  |
| C(1)-C(6)-C(13)-C(12)   | 67.51(13)   |
| C(5)-C(6)-C(13)-C(12)   | -174.29(10) |

Symmetry transformations used to generate equivalent atoms:

Table 7. Hydrogen bonds for sad [Å and °].

| D-H...A             | d(D-H)    | d(H...A)  | d(D...A)   | <(DHA)    |
|---------------------|-----------|-----------|------------|-----------|
| O(1)-H(1O)...O(2)#1 | 0.796(16) | 1.928(16) | 2.7024(14) | 164(2)    |
| O(2)-H(2O)...O(1)#2 | 0.809(14) | 1.930(15) | 2.7381(14) | 176.9(19) |

Symmetry transformations used to generate equivalent atoms:

#1  $x, y-1, z$     #2  $-x+1, y+1/2, -z+1$
